1 ***Soil microbial community responses to short-term***  
2 ***nitrogen addition in China's Horqin Sandy Land***

3 **Niu Yayi<sup>1,2,3</sup>, Duan Yulong<sup>1,3,\*</sup>, Li Yuqiang<sup>1,2,3</sup>, Wang Xuyang<sup>1,3</sup>, Chen Yun<sup>1,2,3</sup>, Wang**

4 **Lilong<sup>1,3</sup>**

5 <sup>1</sup> Northwest Institute of Eco-Environment and Resources, Chinese Academy of Sciences,

6 Lanzhou 730000, China

7 <sup>2</sup> University of Chinese Academy of Sciences, Beijing 100049, China

8 <sup>3</sup> Naiman Desertification Research Station, Northwest Institute of Eco-Environment and

9 Resources, Chinese Academy of Sciences, Tongliao 028300, China

10 \*Corresponding author

11 E-mail: [duanyulong@nieer.ac.cn](mailto:duanyulong@nieer.ac.cn)

12

## 13     **Abstract**

14           Anthropogenic nitrogen (N) addition has increased soil nutrient availability, thereby  
15     affecting ecosystem processes and functions in N-limited ecosystems. Long-term N addition  
16     decreases plant biodiversity, but the effects of short-term N addition on soil microbial  
17     community is poorly understood. The present study examined the impacts of short-term N  
18     addition (NH<sub>4</sub>NO<sub>3</sub>) on these factors in a sandy grassland and semi-fixed sandy land in the  
19     Horqin Sandy Land. We measured the responses of soil microbial biomass C and N; on soil β-  
20     1,4-glucosidase (BG) and β-1,4-N-acetylglucosaminidase (NAG) activity; and soil microflora  
21     characteristics to N additions gradient with 0 (control), 5 (N5), 10 (N10), and 15 (N15) g N m<sup>-2</sup>  
22     yr<sup>-1</sup>. The soil microbial biomass indices, NAG activity, and soil microflora characteristics did  
23     not differ significantly among the N levels, and there was no difference at the two sites. The  
24     competition for N between plants and soil microbes was not eliminated by short-term N  
25     addition due to the low soil nutrient and moisture contents, and the relationships among the  
26     original soil microbes did not change. However, N addition increased BG activity in the N5  
27     and N10 additions in the sandy grassland, and in the N5, N10, and N15 additions in the semi-  
28     fixed sandy land. This may be due to increased accumulation and fixation of plant litter into  
29     soils in response to N addition, leading to increased microbial demand for a C source and  
30     increased soil BG activity. Future research should explore the relationships between soil  
31     microbial community and N addition at the two sites.

32     **Key words:** Nitrogen addition, Soil microbial biomass, Soil enzyme activity, Soil microflora  
33     characteristic, Horqin Sandy Land

## 34     **Introduction**

35 Nitrogen (N) is the major growth-limiting elements for plant growth in most terrestrial  
36 ecosystems, especially in arid and semi-arid ecosystems [1-2]. Changing N availability is  
37 therefore an important component of the functions of terrestrial ecosystems, particularly under  
38 global climate change scenarios [3-4]. During the 20th century, humans have more than  
39 doubled the amount of N added to the biosphere [5]. Anthropogenic N addition in N-limited  
40 ecosystems is a primary component of global change, as it can influence the biogeochemical  
41 coupling of the soil carbon (C) and N cycles by altering organic matter decomposition [6], and  
42 it can profoundly alter soil microbial communities and their enzyme activities [7-8].

43 Arid and semi-arid ecosystems cover one-third of the world's land surface and account for  
44 approximately 15% of the global soil organic carbon pool; they therefore play an important part  
45 in maintaining the world's ecosystem functions [9-10]. The Horqin Sandy Land is the largest  
46 sandy land in China, and comprises a severely desertified area in China's agro-pastoral ecotone,  
47 which has undergone tremendous changes in climate, land use, and anthropogenic N addition  
48 [11]. Sandy grassland and semi-fixed sandy land ecosystems are sensitive to increased  
49 atmospheric N deposition [12]. The availability of N is an important driver of soil enzyme  
50 activity, microbes, and soil microflora characteristics in this area [4, 13].

51 Soil microbes are a highly sensitive and active component of terrestrial ecosystems, as  
52 they respond quickly to environmental changes, such as short-term N enrichment of terrestrial  
53 ecosystems, by driving changes in biomass activity and nutrient cycling, as well as changes in  
54 the soil microbial biomass, quantity, community structure, and diversity, as well as in soil  
55 enzyme activity [14-16].

56 Soil microbial biomass refers to the volume of soil less than 5000  $\mu\text{m}^3$  of total living

57 organisms excluding plant bodies, and which is the most active component of soil organic  
58 matter and the most active factor in the soil [17]. Soil microbial biomass is the driving force for  
59 the transformation and cycling of soil organic matter and soil nutrients; it is also a reserve for  
60 soil nutrients and an important source of nutrients that are available for plant growth, and can  
61 therefore be used as an important indicator of soil fertility [18-20]. Previous studies have shown  
62 that long-term N addition reduces soil microbial biomass [21-23]. Liu et al. (2010) [15] and Li  
63 et al. (2010) [24] showed that long-term N addition decreases soil microbial biomass carbon  
64 (SMBC) and nitrogen (SMBN) in temperate steppe and sandy grassland ecosystems in semi-  
65 arid areas. However, studies of the effects of short-term N addition on soil microbial biomass  
66 in arid and semi-arid ecosystems show considerable disagreement, with researchers reporting  
67 increases [25], decreases [24, 26], and no influence [27]. Since soil microbial biomass has such  
68 an important effect on nutrient transformations and flows between the soil and plants, it is  
69 particularly important to learn their response to N addition to improve our understanding of the  
70 mechanisms that underlie nutrient cycling.

71 Soil enzymes, which are mainly released by soil microbes, play a key role in the  
72 decomposition of soil organic matter [28-29]. Soil  $\beta$ -1, 4-glucosidase (BG) hydrolyzes  
73 disaccharides and trisaccharides from cellulose to produce smaller molecules, such as glucose,  
74 and has been used to characterize C cycles in the soil [30]. Soil  $\beta$ -1, 4-N-acetylglucosaminidase  
75 (NAG) participates in the N cycle and is secreted by microbes to hydrolyze chitin and  
76 peptidoglycan to produce glucosamine [31]. Soil dehydrogenase (DHA) is mainly found in  
77 living cells, and can be used to characterize the overall activity of microbes [32]. Changes in  
78 the activities of these soil enzymes can directly reflect the intensity and speed of soil nutrient

79 release by decomposition of organic matter [33].

80 The effect of long-term N addition on soil microbial biomass and soil enzyme activity in  
81 farmland and forest ecosystems is reasonably well understood, but the feedbacks among soil  
82 microbial biomass, soil enzyme activity, and soil microflora characteristics during the response  
83 to short-term N addition in sandy grassland and semi-fixed sandy land ecosystems requires  
84 further exploration. In the present study, we obtained data to provide a clearer picture of these  
85 feedbacks.

## 86 **Materials and methods**

### 87 **Site description and experimental design**

88 The two sampling sites were established in a sandy grassland and a semi-fixed sandy land  
89 near the Naiman Desertification Research Station of the Chinese Academy of Sciences  
90 (42°55'N, 120°42'E), in a semi-arid region of China's Horqin Sandy Land. The distance  
91 between the two sampling sites was about 1.5 km. The terrain at the study site is flat and open,  
92 with an elevation of 377 m asl. The region has a continental semi-arid monsoon temperate  
93 climate, with an annual mean temperature of 6.8°C, with mean monthly temperatures ranging  
94 from -9.63 °C in January to 24.58 °C in July, and with an annual mean precipitation of 360 mm,  
95 70% of which occurs during the period from May to September. The soils of the two sampling  
96 sites were chestnut soils (Chinese soil classification). [Table 1](#) summarizes the physical and  
97 chemical properties, initial values of soil microbial indices, and enzyme activity of the topsoil  
98 (to a depth of 20 cm) at both sampling sites. The dominant native plant species of the sandy  
99 grassland were *Messerschmidia sibirica*, *Setaria viridis*, and *Eragrostis pilosa*, and those of the  
100 semi-fixed sandy land were *Caragana microphylla*, *Setaria viridis* and *Echinops gmelinii*. The

101 vegetation cover was 60 and 30 %, respectively.

102 **Table 1 The physical and chemical properties, initial values of soil microbial indices, and**  
103 **enzyme activity of the topsoil (to a depth of 20 cm) at the sandy grassland and semi-fixed**  
104 **sandy land sites. Values represent means  $\pm$  SD ( $n = 24$ ).**

| Parameter                       | Sandy grassland    | Semi-fixed sandy land |
|---------------------------------|--------------------|-----------------------|
| SOC (g kg <sup>-1</sup> )       | 1.67 $\pm$ 0.001a  | 3.04 $\pm$ 0.001b     |
| TN (g kg <sup>-1</sup> )        | 0.12 $\pm$ 0.009a  | 0.32 $\pm$ 0.014b     |
| TP (g kg <sup>-1</sup> )        | 0.20 $\pm$ 0.013a  | 0.19 $\pm$ 0.005a     |
| pH                              | 8.15 $\pm$ 0.027a  | 8.50 $\pm$ 0.150b     |
| EC ( $\mu$ S cm <sup>-1</sup> ) | 16.76 $\pm$ 0.517a | 26.75 $\pm$ 0.680b    |
| SMBC (mg kg <sup>-1</sup> )     | 32.24 $\pm$ 2.600a | 26.05 $\pm$ 2.706a    |
| SMBN (mg kg <sup>-1</sup> )     | 4.80 $\pm$ 0.766a  | 5.86 $\pm$ 0.734a     |
| BG (U g <sup>-1</sup> )         | 5.29 $\pm$ 0.353a  | 16.32 $\pm$ 1.165b    |
| NAG (U g <sup>-1</sup> )        | 0.89 $\pm$ 0.143a  | 2.30 $\pm$ 0.323b     |
| DHA (U g <sup>-1</sup> )        | n.d.               | n.d.                  |

105 Note: Values of a parameter followed by different letters differ significantly between the two sampling  
106 sites (One-way ANOVA followed by LSD test,  $P < 0.05$ ). SOC, soil organic C; TN, total nitrogen; TP,  
107 total phosphorus; EC, electric conductivity; SMBC, soil microbial biomass carbon; SMBN, soil  
108 microbial biomass nitrogen; BG, soil  $\beta$ -1,4-glucosidase activity; NAG, soil  $\beta$ -1,4-N-  
109 acetylglucosaminidase activity; DHA, soil dehydrogenase activity; n.d., not detected

110 We established 24 plots, each 1 m  $\times$  1 m, in May 2019. The treatments were a control and  
111 nitrogen addition at 5 g N m<sup>-2</sup> yr<sup>-1</sup> (N5), 10 g N m<sup>-2</sup> yr<sup>-1</sup> (N10), and 15 g N m<sup>-2</sup> yr<sup>-1</sup> (N15), are  
112 these values based on current atmospheric deposition levels (0.50 g N m<sup>-2</sup> yr<sup>-1</sup>) and the  
113 predicted levels in 10 (N5), 20 (N10) and 30 (N15) years [34]. The blocks were separated by a  
114 2.0-m-wide buffer strip, and the plots within each block were separated by a 1.0-m-wide buffer  
115 strip to minimize disturbance from neighboring plots. Nitrogen (NH<sub>4</sub>NO<sub>3</sub>) addition was applied  
116 once, before it rained, in mid-May 2019.

117 We used a 2.5-cm-diameter auger to collect topsoil samples (to a depth of 20 cm) on 15  
118 May 2019, early in the growing season, and on 15 August 2019, at the peak of the growing  
119 season from minimally disturbed natural soils. At each site, we collected topsoil at five random  
120 locations within each plot (1 m × 1 m) and homogenized them to provide a single composite  
121 soil sample, which we packed in sterilized polyethylene bags and transported to the lab in  
122 coolers portable car refrigerators as quickly as possible. All visible roots, residues, and stones  
123 were removed by sieving (with a 2-mm square-aperture mesh). Every sample was divided into  
124 two equal subsamples. One was stored at 4 °C to determine the soil properties, and the other  
125 was stored at -80 °C until to DNA extraction.

## 126 **Measurement of microbial biomass**

127 We used a fumigation-extraction method to measure SMBC and SMBN [35]. In summary,  
128 three fresh 50-g soil samples were placed in separate 100-mL beakers, and were then incubated  
129 in the dark for 7 days at 25 °C and a relative humidity of 70%. One soil sample was used as the  
130 control, and another was fumigated for 24 h with ethanol-free CHCl<sub>3</sub>. The last soil sample was  
131 used to measure the soil moisture content. The control and the fumigated soil samples were  
132 transferred into 250-mL Erlenmeyer flasks, then 100 mL of 0.5 M K<sub>2</sub>SO<sub>4</sub> was added, and the  
133 solution was shaken for 30 min at 25 °C to obtain soil extracts. Extracts were filtered through  
134 0.45-µm cellulose filters and stored at -20 °C until analysis. The SMBC and SMBN contents  
135 were measured using an Elementar Vario TOC (Elementar, Langensfeld, Germany). SMBC  
136 and SMBN were calculated from the difference between the extractable C and N contents in  
137 the fumigated and control samples using conversion factors: k<sub>EC</sub> for C and k<sub>EN</sub> for N were  
138 both equal to 0.45.

## 139 **Enzyme activity**

140 The enzyme activities of the soil BG and NAG were quantified using commercial enzyme  
141 kits following the manufacturer's protocol (BG Assay kit and NAG Assay kit; Solarbio, Beijing,  
142 China). Briefly, BG decomposes p-nitrobenzene- $\beta$ -D-glucopyranoside to form p-nitrophenol,  
143 and NAG decomposes p-nitrobenzene  $\beta$ -N-acetylglucosamine to also form p-nitrophenol,  
144 which has a maximum absorption peak at 400 nm. We used a UV-VIS spectrophotometer (UV-  
145 1800, Mapada Instruments Co., Shanghai, China) to measure the absorbance. BG and NAG  
146 activities were calculated by measuring the rate of increase in absorbance. DHA activity was  
147 also measured using a commercial enzyme kit (the DHA Assay kit, Solarbio). 2, 3, 5-triphenyl  
148 tetrazolium chloride is reduced to triphenyl formazone after receiving hydrogen during cell  
149 respiration. Triphenyl formazone is red and has a maximum absorption peak at a wavelength  
150 of 485 nm, and its absorbance was also measured by UV-VIS spectrophotometry to obtain the  
151 DHA activity.

## 152 **DNA Extraction**

153 From each sample, total DNA was extracted from 0.5 g of soil using the PowerSoil kit  
154 (Omega Laboratories Inc., Mogadore, OH, USA) according to the manufacturer's instructions.  
155 The integrity of the DNA was determined by electrophoresis in 1.0% agarose gels, and the  
156 purity and concentration of the DNA were measured spectrophotometrically with a NanoDrop  
157 ND5000 (Thermo Fisher Scientific Inc., USA).

## 158 **Quantitative Real-time Polymerase Chain Reaction**

159 The polymerase chain reaction (PCR) was performed using a Line-Gene 9600 Plus Cycler  
160 (Thermo Fisher Scientific Inc.). The hyper-variable 444 bp V3 to V4 region of the bacterial



161 16S rRNA was amplified for each sample using two primers (338F, 5'-  
162 ACTCCTACGGGAGGCAGCAG-3'; 806R, 5'-GGACTACHVGGGTWTCTAAT-3') [36].  
163 Similarly, the 317-bp ITS1 region of the fungal ITS rRNA was amplified for each sample using  
164 two primers (ITS1F, 5'-CTTGGTCATTTAGAGGAAGTAA-3'; ITS2R, 5'-  
165 GCTGCGTTCTTCATCGATGC-3') [37].

166 To estimate bacterial and fungal small-subunit rRNA gene abundances, we generated  
167 standard curves using a 10-fold serial dilution with a plasmid containing a full-length copy of  
168 either the *Escherichia coli* 16S rRNA gene or the ITS rRNA gene. Quantitative PCR (qPCR)  
169 was performed with 25 mg of the sample mixed with 12.5 mL of ChamQ SYBR Color qPCR  
170 Master Mix (2X) (Vazyme Biotech Co., Ltd, Nanjing, China), 0.5 mL solutions (10 mM) of  
171 each forward and reverse primer, and 9.5 mL of sterile, double-distilled H<sub>2</sub>O. Standard and  
172 environmental DNA samples were added at 2.0 mL per reaction. The reaction was carried out  
173 on a Line-Gen 9600 Plus Cycler (Thermo Fisher Scientific Inc.). The cycling program was an  
174 initial denaturation at 95 °C for 3 min, followed by 40 cycles of 94 °C for 30 s, 53 °C for 30 s,  
175 and 72°C for 45 s, with a final extension at 72 °C for 5 min. Melting curve and gel  
176 electrophoresis analyses were performed to confirm that the amplified products were of the  
177 appropriate size. Bacterial and fungal gene copy numbers were generated using a regression  
178 equation for each assay that related the cycle threshold (*C<sub>t</sub>*) value to the known number of  
179 copies in the standards. All of the qPCR reactions were run in triplicate for each soil sample.  
180 The average bacterial PCR efficiency was 92.22% with an *R*<sup>2</sup> of the standard curves of 0.9991,  
181 and the fungal PCR efficiency was 91.99% with an *R*<sup>2</sup> of the standard curves of 0.9995.

## 182 **PCR Amplification and Illumina MiSeq Sequencing**

183 PCR was carried out in triplicate in a 20- $\mu$ L reaction volume that contained 4  $\mu$ L of 5-fold  
184 reaction buffer, 4  $\mu$ L of dNTPs (2.5 mM), 0.8  $\mu$ L of each primer (5  $\mu$ M), 1  $\mu$ L of template DNA  
185 (ca. 10 ng), and 0.4  $\mu$ L of Pfu DNA Polymerase (TransStart-FastPfu DNA Polymerase,  
186 TransGen Biotech, Beijing, China), with double-distilled H<sub>2</sub>O to bring the solution to the final  
187 volume. The PCR program included an initial denaturation at 95°C for 3 min; 35 cycles at 94°C  
188 for 30 s, annealing at 55°C for 30 s, and an extension at 70°C for 45 s; and a final extension at  
189 72 °C for 10 min. PCR was performed using an ABI GeneAmp 9700 Cyclor (Thermo Fisher  
190 Scientific Inc.).

191 Different barcode sequences were added at the 5' end of the forward primer to separate  
192 corresponding reads from the data pool that was generated in a single sequencing run. The  
193 amplicons were extracted by electrophoresis in 2.0% agarose gels, purified by using a Gel  
194 Extraction Kit (Axygen Co., Hangzhou, China) according to the manufacturer's instructions,  
195 and quantified using a QuantiFluor-ST Fluorimeter (Promega, Fitchburg, WI, USA). The  
196 purified amplicons were pooled in an equimolar and paired-end sequence (2 $\times$ 300) on an  
197 Illumina MiSeq PE300 Sequencer (Majorbio Co. Ltd., Shanghai, China) according to the  
198 manufacturer's standard protocols.

### 199 **Statistical analysis, processing, and analysis of the sequencing data**

200 We tested for differences in the soil properties, soil microbial biomass indices, and soil  
201 enzyme activity between the sandy grassland and semi-fixed sandy land with different N  
202 addition levels using one-way analysis of variance (one-way ANOVA). Site type and N addition  
203 were used as treatment factors to conduct two-factor ANOVA for soil microbial indicators and  
204 enzyme activity. The data were tested to confirm normality and homogeneity of variance

205 (Levene's test) prior to ANOVA. When the ANOVA results were significant, we used the least-  
206 significant-difference test to identify significant differences between pairs of values, with  
207 significance at  $P < 0.05$ . The analyses were performed using version 19.0 of the SPSS software  
208 (<https://www.ibm.com/analytics/spss-statistics-software>).

209 Raw FASTQ files were de-multiplexed and quality-filtered using version 0.35 of the  
210 Trimmomatic software (<http://www.usadellab.org/cms/?page=trimmomatic>) with the  
211 following criteria: (i) The 300-bp reads were truncated at any site that obtained an average  
212 quality score less than 20 over a 50-bp sliding window, and truncated reads shorter than 50 bp  
213 were discarded. (ii) We removed the extracted matching barcodes, and any two-nucleotide  
214 mismatches in the primer matching and reads that contained ambiguous characters. (iii) Only  
215 overlapping sequences longer than 10 bp were assembled according to their overlapping  
216 sequence. Reads that could not be assembled were discarded.

217 Quality sequences were aligned in accordance with the SILVA alignment database  
218 (<https://www.arb-silva.de/>) [38] and clustered into operational taxonomic units (OTUs) using  
219 version 7.1 of the USEARCH software (<https://www.drive5.com/usearch/>). OTUs with a 97%  
220 or better similarity level were used for the rarefaction curve, and we calculated the  $\alpha$ -diversity  
221 indices, including the ACE, Chao, Shannon, and Simpson diversity indices, and performed  
222 coverage analysis using version 1.30.2 of the mothur software (<https://www.mothur.org/>) [39].  
223 Taxonomic assignments of the OTUs with at least 97% similarity were performed using mothur  
224 in accordance with the SILVA (132) or Unite (8.0) databases with a 70% confidence interval.  
225 For taxonomic analysis, we used the SILVA database and the Unite database  
226 (<http://unite.ut.ee/index.php>) for bacteria and fungi, respectively. For  $\beta$ -diversity analysis, we

227 performed principal-components analysis (PCA) and generated a hierarchical heatmap using  
228 version 2.5-6 the vegan package (<https://cran.r-project.org/web/packages/vegan/index.html>)  
229 for version 3.2.0 of the R statistical software (<https://www.r-project.org/>).

## 230 **Data deposition**

231 All sequencing data associated with this study have been deposited at the NCBI Sequence  
232 Read Archive (<https://www.ncbi.nlm.nih.gov/sra>) under project accession number  
233 PRJNA615072.

## 234 **Results**

### 235 **Changes in microbial biomass indices**

236 In the sandy grassland, the soil biomass microbial indices (SMBC, SMBN, and  
237 SMBC/SMBN) did not differ significantly among N additions ( $P > 0.05$ , [Table 2](#)). All N  
238 addition levels were significantly decreased SMBC, and control level was significantly  
239 decreased SMBN compared with the background ( $P < 0.05$ , [Table 2](#)). In the semi-fixed sandy  
240 land, N addition significantly decreased SMBC and SMBN compared with the control ( $P <$   
241  $0.05$ , [Table 2](#)), but with no significant differences among N addition levels ( $P > 0.05$ ).  
242 SMBC/SMBN did not differ significantly from the control at any N addition level. In compared  
243 with background, control level was significantly increased SMBC, and all N addition levels  
244 were significantly increased SMBC/SMBN ( $P < 0.05$ , [Table 2](#)). We also compared the soil  
245 microbial biomass indices in a given treatment between the sampling sites ([Table 2](#)). In the  
246 control, SMBC and SMBN were significantly higher in the semi-fixed sandy land ( $P < 0.05$ ),  
247 but their ratio did not differ significantly. However, the SMBC, SMBN, and SMBC/SMBN did  
248 not differ significantly between the two sampling sites in any N treatment ( $P > 0.05$ ). In the

249 background, the SMBC/SMBN of sandy grassland were significantly higher in the semi-fixed  
250 sandy land ( $P < 0.05$ ).

251 **Table 2 The soil microbial biomass indices (soil microbial biomass carbon (SMBC), soil microbial biomass nitrogen (SMBN), and SMBC/SMBN ratio)**  
 252 **and soil enzyme activities ( $\beta$ -1,4-glucosidase (BG), soil N-acetyl- $\beta$ -D-glucosidase (NAG), and soil dehydrogenase activity (DHA)) in the topsoil (to a**  
 253 **depth of 20 cm) in the sandy grassland and semi-fixed sandy land. Nitrogen addition treatments are no N addition (Control), 5 g N m<sup>-2</sup> yr<sup>-1</sup> (N5), 10 g**  
 254 **N m<sup>-2</sup> yr<sup>-1</sup> (N10), and 15 g N m<sup>-2</sup> yr<sup>-1</sup> (N15).**

| Parameter                   | Sandy grassland |              |              |              |              | Semi-fixed sandy land |               |               |               |              |
|-----------------------------|-----------------|--------------|--------------|--------------|--------------|-----------------------|---------------|---------------|---------------|--------------|
|                             | Background      | Control      | N5           | N10          | N15          | Background            | Control       | N5            | N10           | N15          |
| SMBC (mg kg <sup>-1</sup> ) | 32.24±2.60Ab    | 17.16±2.59Aa | 16.32±4.37Aa | 16.81±4.45Aa | 13.48±1.97Aa | 26.05±2.71Aa          | 62.99±14.02Bb | 25.50±1.98Aa  | 20.36±6.87Aa  | 23.57±3.93Aa |
| SMBN (mg kg <sup>-1</sup> ) | 4.80±0.77Ab     | 2.06±0.36Aa  | 4.07±0.57Aab | 3.28±0.80Aab | 2.34±0.38Aab | 5.86±0.73Aab          | 8.31±1.65Bb   | 4.16±0.89Aa   | 3.10±0.99Aa   | 4.36±1.38Aa  |
| SMBC/SMBN                   | 7.84±0.90Ba     | 7.79±2.72Aa  | 4.79±1.49Aa  | 6.44±1.84Aa  | 5.24±0.62Aa  | 4.77±0.41Aa           | 7.49±0.61Ab   | 6.75±1.57Aab  | 5.31±1.44Aab  | 6.03±0.68Aab |
| BG(U g <sup>-1</sup> )      | 5.29±0.35Aa     | 11.98±0.36Bc | 14.26±0.60Ad | 19.49±0.60Be | 6.99±0.43Ab  | 16.32±1.17Bb          | 6.44±0.70Aa   | 11.67±1.00Aab | 11.09±0.71Aab | 14.06±0.29Bb |
| NAG (U g <sup>-1</sup> )    | 0.89±0.14Aa     | 1.48±0.14Aa  | 1.21±0.22Aa  | 2.64±0.16Ab  | 2.79±0.27Ab  | 2.30±0.32Ba           | 3.50±0.83Ba   | 2.73±0.32Ba   | 2.63±0.18Aa   | 2.85±0.84Aa  |
| DHA(U g <sup>-1</sup> )     | n.d.            | n.d.         | n.d.         | n.d.         | n.d.         | n.d.                  | n.d.          | n.d.          | n.d.          | n.d.         |

255 **Note:** Values in a column with different lowercase letters represent significant difference between different N addition levels under same site (One-way ANOVA followed by  
 256 LSD test,  $P < 0.05$ ); those with different capital letters represent significant difference between different site under same N addition level ( $P < 0.05$ ). Background, Initial value  
 257 measured in mid-May; n.d., not detected.

258 The results of two-way ANOVA showed that site type, N addition and their interactions  
259 had a significant effect on SMBC, and SMBN was significantly affected by site type and the  
260 interactions between site type and N addition ( $P < 0.01$ , [Table 3](#)).

261 **Table 3 Two-way ANOVA results of site type, N addition and their interactions on soil**  
262 **microbial biomass indices (soil microbial biomass carbon (SMBC), soil microbial biomass**  
263 **nitrogen (SMBN), and SMBC/SMBN ratio) and soil enzyme activities ( $\beta$ -1,4-glucosidase**  
264 **(BG), soil N-acetyl- $\beta$ -D-glucosidase (NAG), and soil dehydrogenase activity (DHA)) in the**  
265 **topsoil (to a depth of 20 cm).**

| Parameter | Site type | N addition | Site type×N addition |
|-----------|-----------|------------|----------------------|
| SMBC      | 20.12**   | 4.83**     | 5.15**               |
| SMBN      | 10.81**   | 1.25       | 4.64**               |
| SMBC/SMBN | 0.02      | 1.29       | 0.43                 |
| BG        | 29.91**   | 41.86**    | 53.64**              |
| NAG       | 8.36**    | 2.31       | 3.00                 |
| DHA       | —         | —          | —                    |

266 Note: Significant levels (ANOVA followed by LSD test): \*\*,  $P < 0.01$ ; \*,  $P < 0.05$ . SMBC, soil microbial  
267 biomass carbon; SMBN, soil microbial biomass nitrogen; BG, soil  $\beta$ -1,4-glucosidase activity; NAG, soil  
268  $\beta$ -1,4-N-acetylglucosaminidase activity; DHA, soil dehydrogenase activity.

### 269 **Changes in soil enzyme activities**

270 N addition changed soil enzyme activities, but the effect depended on the enzyme and the  
271 sampling site ([Table 2](#)). DHA activity at both sampling sites was below the detection limit, so  
272 in the rest of this paper, we focus on changes of the BG and NAG activities. In the sandy  
273 grassland, N addition significantly increased BG activity compared with the control in N5 and  
274 N10, but significantly decreased BG activity in N15 ( $P < 0.05$ ). All N addition significantly

275 increased BG activity compared with the background ( $P < 0.05$ ). NAG activity had no  
276 significantly difference in control and N5, but increased significantly in N10 and N15 ( $P <$   
277  $0.05$ ). In the semi-fixed sandy land, N addition significantly increased BG activity compared  
278 with the control in all three treatments ( $P < 0.05$ ), but there was no significant difference  
279 between N5, N10, and N15 ( $P > 0.05$ ). NAG activity did not differ significantly among the  
280 treatments and background ( $P > 0.05$ ). The results of two-way ANOVA showed that site type,  
281 N addition and their interactions had a significant effect on BG, and NAG was significantly  
282 affected by site type and the interactions between site type and N addition ( $P < 0.01$ , [Table 3](#)).

### 283 **Microbial abundance**

284 We used *q*PCR to determine the gene copy numbers for the total bacteria and fungi species  
285 at the two sampling sites ([Fig 1](#)). For bacteria, the 16S rRNA gene copy numbers in the sandy  
286 grassland and semi-fixed sandy land ranged from  $7.88 \times 10^7 \pm 1.41 \times 10^7$  to  $9.91 \times 10^7 \pm 1.09 \times 10^7$   
287 copies/g and from  $7.11 \times 10^7 \pm 0.80 \times 10^7$  to  $20.7 \times 10^7 \pm 6.09 \times 10^7$  copies/g, respectively. There  
288 were no significant differences in soil bacterial abundance between the sandy grassland and  
289 semi-fixed sandy land ( $P > 0.05$ ). For fungi, the ITS rRNA gene copy numbers in the sandy  
290 grassland and semi-fixed sandy land ranged from  $2.44 \times 10^6 \pm 0.47 \times 10^6$  to  $5.19 \times 10^6 \pm 2.41 \times 10^6$   
291 copies/g and from  $1.15 \times 10^6 \pm 0.16 \times 10^6$  to  $11.3 \times 10^6 \pm 5.52 \times 10^6$  copies/g, respectively. There  
292 were also no significant differences in soil fungal abundance between the sandy grassland and  
293 semi-fixed sandy land ( $P > 0.05$ ). In addition, the bacterial and fungal abundance did not  
294 differ significantly between sandy grassland and semi-fixed sandy land at any N addition level  
295 ( $P > 0.05$ ).

296 **Fig 1. Comparison of the bacterial 16S rRNA gene and fungal ITS rRNA gene copy**



297 **numbers from the soils at the two sampling sites as determined by qPCR. Values are**  
298 **means  $\pm$  SD. Nitrogen addition treatments: control, no N addition; N5, 5 g N m<sup>-2</sup> yr<sup>-1</sup>;**  
299 **N10, 10 g N m<sup>-2</sup> yr<sup>-1</sup>; N15, 15 g N m<sup>-2</sup> yr<sup>-1</sup>.**

### 300 **MiSeq sequencing and $\alpha$ -diversity indices**

301 We obtained 1,131,376 valid reads and 2397 OTUs from the 24 samples through Illumina  
302 MiSeq sequencing analysis and classified the bacteria in these samples. Each library contained  
303 from 40,037 to 51,789 reads, with 1811 to 2086 different phylogenetic OTUs. The average  
304 length of high-quality sequences ranged from 412.779 to 417.805 bp. Similarly, we obtained  
305 1,604,773 valid reads and 473 OTUs for fungi, and each library contained from 56,652 to  
306 73,089 reads, with 161 to 373 different phylogenetic OTUs. The average length of high-quality  
307 sequences ranged from 230.261 to 250.127 bp.

308 Rarefaction curves approached saturation in all samples, indicating that the data volume  
309 in the sequenced reads was reasonable, and the discovery of a high number of reads contributed  
310 relatively little to the total number of OTUs. The curves show that only a very small fraction of  
311 the new phylotypes of the bacteria was retrieved after 50,000 sequencing reads, while the fungi  
312 was retrieved after 10,000 sequencing reads. This rarefaction curve indicated the presence of  
313 low variation in the total number of OTUs among the different samples ([S1 Fig](#)).

314 We estimated the  $\alpha$ -diversity based on the observed species using the ACE, Chao, Shannon,  
315 and Simpson diversity indices. The results for bacterial and fungal diversity are summarized in  
316 [S1 and S2 Tables](#), respectively. The observed species score (number of OTUs) for the bacterial  
317 communities ranged from 1811 to 2086, and the ACE and Chao scores ranged from 4242.927  
318 to 5532.818 and from 4119.895 to 5489.310, respectively. The Shannon and Simpson scores

319 ranged from 6.159 to 6.840 and 0.0030 to 0.0153, respectively. The species score (number of  
320 OTUs) for the fungal communities ranged from 161 to 373, and the ACE and Chao scores  
321 ranged from 173.659 to 395.885 and from 172.143 to 397.459, respectively. The Shannon and  
322 Simpson scores ranged from 1.386 to 4.081 and 0.039 to 0.581, respectively.

### 323 **Taxonomic composition**

324 The samples yielded different numbers and abundance of OTUs. Sequences that could not  
325 be classified into any known group or that had an undetermined taxonomic position were  
326 assigned as unclassified or no rank group, respectively.

327 The bacterial OTUs were assigned into 26 phyla, 236 families, and 475 genera. Of the  
328 prokaryotic phylotypes, 10 of the 26 phyla were common to the 24 libraries: Actinobacteria,  
329 Bacteroidetes, Chloroflexi, Cyanobacteria, Firmicutes, Gemmatimonadetes, Nitrospirae,  
330 Patescibacteria, and Proteobacteria (Fig 2A), and comprised more than 98% of the total reads  
331 in every library. Proteobacteria and Actinobacteria were the two most abundant groups,  
332 comprising approximately 31.6% (357,483 reads) and 30.7% (347,423 reads) of the total reads  
333 across all samples, respectively. However, the proportions of Firmicutes and Actinobacteria  
334 varied widely among the samples, with values ranging from 19.8 to 48.1% and from 13.5 to  
335 38.3%, respectively. The proportion of Proteobacteria reached their lowest value in sample  
336 G3N15, which was significantly different from that in samples of G1N15 and G5N15. (Sample  
337 names are defined as the site type [G, sandy grassland; S, semi-fixed sandy land] followed by  
338 the N addition treatment.) Acidobacteria and Chloroflexi were the third- and fourth-most  
339 abundant groups, comprising 14.7% (166,330) and 10.17% (115,083) of the reads, respectively,  
340 across all samples. Members of the Bacteroidetes, Gemmatimonadetes, Firmicutes,

341 Patescibacteria, Cyanobacteria, and Nitrospirae accounted for 3.4% (38,273 reads), 3.2%  
342 (36,720 reads), 2.4% (27,384 reads), 1.3% (14,819 reads), 0.6% (6,537 reads), and 0.5% (6,046  
343 reads) of the reads in all libraries combined. The other groups represented a small fraction (ca.  
344 1.4%) of the total bacterial community.

345 **Fig 2A. Relative abundance of phylotypes in the bacterial community. Sample names are**  
346 **the sampling location (G, sandy grassland; S, semi-fixed sandy land) followed by the**  
347 **nitrogen addition treatment: Control, no N addition; N5, 5 g N m<sup>-2</sup> yr<sup>-1</sup>; N10, 10 g N m<sup>-2</sup>**  
348 **yr<sup>-1</sup>; N15, 15 g N m<sup>-2</sup> yr<sup>-1</sup>.**

349 The fungal communities were assigned to 8 phyla, 105 families, and 167 genera. Among  
350 them, Ascomycota was the dominant group, comprising 69.0% (1,107,374 reads) of the total  
351 reads (Fig 2B). Mortierellomycota was the second-largest group, accounting for 26.6%  
352 (427,349 reads) of the total reads. However, the proportions of Ascomycota and  
353 Mortierellomycota varied widely among the samples, accounting for 19.2 to 93.0% of the reads  
354 and 14.9 to 80.4% of the reads, respectively. The proportion of Ascomycota reached its lowest  
355 value in S1CK, and was significantly different from the proportions in samples of S3CK and  
356 S5CK. The other fungal phyla accounted for only 4.4% of the total (70,050 reads):  
357 Basidiomycota (2.1%, 34,190 reads), Fungi\_unclassified (1.9%, 30,215 reads),  
358 Chytridiomycota (0.2%, 3,201 reads), Calcarisporiellomycota (0.1%, 1,383 reads),  
359 Olpidiomycota (<0.1%, 826 reads), and Glomeromycota (<0.1%, 235 reads).

360 **Fig 2B. Relative abundance of phylotypes in the fungal community. Sample names are the**  
361 **sampling location (G, sandy grassland; S, semi-fixed sandy land) followed by the nitrogen**  
362 **addition treatment: Control, no N addition; N5, 5 g N m<sup>-2</sup> yr<sup>-1</sup>; N10, 10 g N m<sup>-2</sup> yr<sup>-1</sup>; N15,**

363  $15 \text{ g N m}^{-2} \text{ yr}^{-1}$ .

## 364 **Microbial community structure**

365 To analyze the similarity of the bacterial communities in the different samples, we  
366 constructed a heatmap using hierarchical cluster analysis. For bacteria, the heatmap was based  
367 on the 50 most abundant bacterial genera, and this divided the bacteria into two main groups  
368 (Fig 3A). One was mainly composed of genera from the SN10 group, including S3N10 and  
369 S5N10, and grouped them with S5N15, S1N15, S1N10, and S3N15; the other grouped the  
370 members from the other samples together. The PCA results also revealed that bacterial  
371 communities from samples of SN10 group and SN15 group were grouped together at the right  
372 side of the graph along PC1, whereas the other samples were grouped at the left along PC1,  
373 with PC1 accounting for 39.4% of the total variations (Fig 4A). PC2 only accounted for 19.8%  
374 of the variation, but again separated the samples of SN10 and SN15 group from the other  
375 samples.

376 **Fig 3A. Heat map representations and cluster analysis for the microbial community based**  
377 **on 24 samples from the two sampling sites. Bacterial distributions for the 50 most-**  
378 **abundant genera and families. The double hierarchical dendrogram shows the bacterial**  
379 **and fungal distribution. Bacterial and fungal phylogenetic trees were calculated using the**  
380 **neighbor-joining method. Sample names are composed of the sampling site (G, sandy**  
381 **grassland; S, semi-fixed sandy land) and nitrogen addition: Control (CK), no N addition;**  
382 **N5,  $5 \text{ g N m}^{-2} \text{ yr}^{-1}$ ; N10,  $10 \text{ g N m}^{-2} \text{ yr}^{-1}$ ; N15,  $15 \text{ g N m}^{-2} \text{ yr}^{-1}$ .**

383 **Fig 4A. Results of the principal-components analysis (PCA) on bacterial communities.**  
384 **Plots are based on the UniFrac distance. Sample names are composed of the sampling site**

385 **(G, sandy grassland; S, semi-fixed sandy land) and nitrogen addition: Control (CK), no**  
386 **N addition; N5, 5 g N m<sup>-2</sup> yr<sup>-1</sup>; N10, 10 g N m<sup>-2</sup> yr<sup>-1</sup>; N15, 15 g N m<sup>-2</sup> yr<sup>-1</sup>.**

387 For fungi, the heatmap was based on the top 50 families (Fig 3B). The samples could be  
388 divided into two clusters at the family level: one was mainly composed of the samples G1N10,  
389 S5C, S5N15, S3N5, and grouped with S1N10, S1N5, S5N5, G3N15, G5N5, S1C, S5N10,  
390 S1N15, and S3N15, and the other cluster grouped the rest of the samples together. The PCA  
391 plot grouped the fungal communities from the samples G5N5, S1N5, S3N15, G3N15, S5N10,  
392 and S1C together to the right along PC1, which accounted for 38.8% of the variation, and PC2  
393 (which accounted for 12.5% of the variation) produced the same separation of the two sample  
394 groups (Fig 4B).

395 **Fig 3B. Heat map representations and cluster analysis for the microbial community based**  
396 **on 24 samples from the two sampling sites. Fungal distributions for the 50 most-abundant**  
397 **genera and families. The double hierarchical dendrogram shows the bacterial and fungal**  
398 **distribution. Bacterial and fungal phylogenetic trees were calculated using the neighbor-**  
399 **joining method. Sample names are composed of the sampling site (G, sandy grassland; S,**  
400 **semi-fixed sandy land) and nitrogen addition: Control (CK), no N addition; N5, 5 g N m<sup>-2</sup>**  
401 **yr<sup>-1</sup>; N10, 10 g N m<sup>-2</sup> yr<sup>-1</sup>; N15, 15 g N m<sup>-2</sup> yr<sup>-1</sup>.**

402 **Fig 4B. Results of the principal-components analysis (PCA) on fungal communities. Plots**  
403 **are based on the UniFrac distance. Sample names are composed of the sampling site (G,**  
404 **sandy grassland; S, semi-fixed sandy land) and nitrogen addition: Control (CK), no N**  
405 **addition; N5, 5 g N m<sup>-2</sup> yr<sup>-1</sup>; N10, 10 g N m<sup>-2</sup> yr<sup>-1</sup>; N15, 15 g N m<sup>-2</sup> yr<sup>-1</sup>.**

## 406 **Discussion**

## 407 **The effects of N addition on soil microbial biomass indices**

408 Our result showed the peaking growing season of SMBC and SMBN were significant  
409 higher those of background (Table 2), which is consistent with previous studies [40-41]. The  
410 SMBC and SMBN were lower in the peak growing season and higher in the dormancy season.  
411 This may be due to the large demand for soil nutrients by plants at the peak of the growing  
412 season limited the availability of nutrients by soil microbes, so SMBC and SMBN were  
413 decreased in the peaking growing [42].

414 Our goal was to determine the effects of changes in the soil microbial biomass indices  
415 (SMBC, SMBN, SMBC/SMBN) resulting from N addition at different levels. We found no  
416 significant effects of short-term N addition on these indices in the sandy grassland, which agrees  
417 with previous reports [43-45]. In the short term, the activity of soil microbes is regulated more  
418 strongly by plants than by the direct effects of N addition [45]. The plants competed for nutrient  
419 elements strongly than the microbes for the available N, and the original relationships among  
420 soil microbes may not change immediately in response to N addition. This may explain why  
421 we observed no difference in soil microbial biomass among the short-term N addition  
422 treatments in the sandy grassland. This could be attributed to the small changes in the plant  
423 community during the first growing season [45]. However, the effect of N addition on grassland  
424 soil microbial biomass depended on the amount, type, time, and initial level of nitrogen addition  
425 in grasslands in previous research. It is widely accepted that long-term N addition decreases  
426 soil microbial biomass [46-48], mainly because under natural conditions, the promoting effect  
427 of N addition on plant growth will decrease over time, resulting in a reduction of the amount of  
428 plant residues and litter that is input into the soil, and the increase of soil microbial biomass

429 will then be inhibited by a lack of sufficient carbon [47]. We plan to continue the N addition  
430 experiments at the same sites to explore long-term changes in the microbial biomass indices.

431 In the semi-fixed sandy land, short-term N significantly decreased SMBC and SMBN, but  
432 their ratio was unaffected by the N addition. *Caragana microphylla* is the dominant species in  
433 the ecosystem, and the species has solid nitrogen capacity, so N addition could reduce the  
434 quantity and quality of its root exudates, thereby decreasing SMBC and SMBN [49]. Some  
435 studies have shown that the addition of N alleviated the N limitation of the soil, but that the  
436 plants decreased their allocation of resources to belowground biomass by decreasing root  
437 growth and releasing of easily decomposed materials, thereby inhibiting the growth of  
438 microorganisms [50-51]. In addition, the lack of C input to the soils represents a substrate  
439 limitation that can decrease SMBC. Dijkstra et al. (2005) [52] showed that short-term N  
440 application reduced SMBC and SMBN in tall grasses in Minnesota (United States), and  
441 explained that this resulted from a reduction of plant root secretion, resulting in an insufficient  
442 carbon source available to soil microbes, which is similar to the present results.

443 SMBC and SMBN in the semi-fixed sandy land were significantly higher than those in  
444 sandy grassland in the control. At the same N addition level, there was no significant difference  
445 in the microbial indices between the two sampling sites. The differences of SMBC and SMBN  
446 between the two sampling sites may have resulted from differences in the dominant plants. The  
447 nitrogen-fixing effect of the root system of *Caragana microphylla* and the existence of a large  
448 amount of root exudates may increase the soil microbial biomass compared with an annual or  
449 perennial herb-based ecosystem such as that in the sandy grassland [53].

450 **The effects of N addition on soil enzymes**

451           The N5 and N10 additions significantly promoted BG activity in the sandy grassland,  
452       whereas N15 significantly decreased BG activity. N5, N10, and N15 additions significantly  
453       increased the activity of BG in the semi-fixed sandy land. Thus, N addition increased the overall  
454       activity of BG at both sampling sites. The change of BG activity reflects the variety of organic  
455       matter in the soil. With increasing N content, the N limitation for microbe decreases, and N  
456       addition promoted the accumulation and fixation of plant litter in the soil, leading to an  
457       increased carbon source for soil microorganisms to meet their demand and increasing BG  
458       activity in the soil [54]. Many studies have shown that N addition can promote BG activity [13,  
459       55-56], and our results agree with that previous research. There were no differences in BG  
460       activity between the two sampling sites for other N addition treatment, but BG activity in the  
461       control and N10 were significantly higher in the sandy grassland than in the semi-fixed sandy  
462       land. This may be because SOC and SMBC were lower in the sandy grassland than in the semi-  
463       fixed sandy land. Soil enzyme activities increase to maintain efficient utilization of soil carbon  
464       in areas with a low soil organic carbon content [57]. This may explain why the BG enzyme  
465       activity was relatively high in the sandy grassland.

466           NAG is the terminal enzyme in the mineralization of soil organic nitrogen, and its  
467       degradation products can be directly used by plants and microbes. Its activity can therefore  
468       characterize soil nitrogen turnover [58]. We found that the N10 and N15 addition levels  
469       significantly increased NAG enzyme activity in the sandy grassland. The reason may be that  
470       the addition of N increased the input of plant biomass to the soil, which increased the soil  
471       organic nitrogen content and induced NAG secretion [59-60]. NAG activity in the semi-fixed  
472       sandy land did not differ among the N addition levels and at a given N addition, only the result



473 at background, control, and N5 differed significantly between the sites, with a higher value in  
474 the semi-fixed sandy land, this may be due to the original differences between two sites. Short-  
475 term N addition did not alter overall NAG activity in the soil, and this may be because the  
476 microbial community structure did not change [61].

477 DHA can catalyze the redox reaction in soil, and always was used to characterize the  
478 overall activity of soil microbes [32]. Previous study had shown that long-term nitrogen  
479 addition significantly inhibits DHA activity by reducing soil pH [62]. Our result showed that  
480 the DHA was no detected, this could be attributed to low soil nutrient and low soil microbial  
481 activity in the study area, DHA activity was below the detection limit. Further research will be  
482 needed to examine DHA activity in future N addition treatment.

### 483 **The effects of N addition on the soil microflora characteristics**

484 To compare the soil microflora characteristics of the sandy grassland and semi-fixed sandy  
485 land, we used *q*PCR and an Illumina MiSeq high-throughput sequencer to reveal differences in  
486 the microbial abundance, diversity, and community structure between the two sampling sites.

487 For bacteria, the number of 16S rRNA gene copies decreased compared with the control,  
488 from  $20.7 \times 10^7$  to  $7.8 \times 10^7$ , in response to increasing N addition in the semi-fixed sandy land ( $P$   
489  $> 0.05$ ), but the number of bacterial gene copies changed little after the treatment in the sandy  
490 grassland. For fungi, the dynamics of the ITS rRNA gene copies were similar to those for  
491 bacteria at both sampling sites. For example, the ITS rRNA gene copies reached the highest  
492 score, at  $1.13 \times 10^7$ , without N addition in the semi-fixed sandy land, and the number of copies  
493 decreased with increasing N addition. Thus, there were no significant differences in the soil  
494 bacterial and fungal abundance at either site between samples without and with N addition.

495           The sequencing results showed a high bacterial diversity and abundance, but a relatively  
496 low fungal diversity and abundance, at both sampling sites in the Horqin Sandy Land. For the  
497 bacteria, the Proteobacteria, Actinobacteria, and Acidobacteria were the dominant bacterial  
498 taxa. Proteobacteria and Actinobacteria are considered to be the dominant bacterial groups in  
499 many terrestrial environments, whereas Firmicutes have high resistance to high temperatures  
500 and soil moisture, and are frequently associated with arid terrestrial environments. For the fungi,  
501 the Ascomycota and Mortierellomycota were dominant. There was no obvious change of the  
502 bacterial and fungal community structures at both sites in response to the N addition treatments.

503           In the present study, soil microbial abundance, phylogenetic  $\alpha$ -diversity, and the  
504 community's taxonomic structure were insensitive to the short-term N addition in the Horqin  
505 Sandy Land, which can be partly attributed to the poor soil nutrient conditions and limited  
506 moisture supply, leading to rapid uptake of the added N by the vegetation before it could  
507 become part of SMBN. This would remain true if the competition for N between plants and soil  
508 microbes was not alleviated by the N addition [62-63]. The stability of the microbial community  
509 may result from more than the community diversity and structure; it is also likely to be linked  
510 to a range of other vegetation and soil properties, including the plant species, the abundance  
511 and size of soil aggregates and the substrate quality. The resistance and resilience (stability) of  
512 soil microbial communities are governed by soil physical and chemical structures through their  
513 effect on the microbial community composition and physiology [64-65]. In the present study,  
514 the N addition probably failed to change the soil's physical and chemical properties and  
515 microbial community structure.

516           Previously, many studies concentrated on the effects of long-term nitrogen addition on

517 soil microorganisms, and researchers found that the nitrogen application had a dual effect on  
518 soil physical-chemical properties, and these changes then altered the diversity of soil microbes  
519 and their community structure. On the one hand, application of sufficient nitrogen could  
520 improve soil nutrient conditions and facilitate microbial growth and reproduction [66-67]. On  
521 the other hand, excessive nitrogen application can lead to eutrophication and acidification of  
522 soils and can inhibit fungal growth and reproduction, especially for arbuscular mycorrhizal  
523 fungi, and this can lead to changes in the overall soil microbial community. In addition, long-  
524 term nitrogen application can significantly decrease microbial diversity in grassland soils [68-  
525 71]. It will be necessary to conduct long-term nitrogen application experiments in the Horqin  
526 Sandy Land to determine how the present results will change over time.

## 527 **Conclusion**

528 Short-term N addition had no significant effects on the three soil microbial indices (SMBC,  
529 SMBN, and SMBC/SMBN), on the activity of NAG, and on soil microflora characteristics (soil  
530 microbial abundance, phylogenetic  $\alpha$ -diversity and taxonomic structure) at the three N addition  
531 levels in the sandy grassland and semi-fixed sandy land. This appears to be because the short-  
532 term N addition did not alleviate the competition for N between plants and soil microbes, and  
533 because the relationships among the original soil microbes may not have changed sufficiently  
534 to affect the community structure. However, the soil BG activity increased with increasing N  
535 addition at both sites. The N addition in the first growing season had no significant impact on  
536 the measured soil microbes. Long-term studies will be needed to examine the responses of the  
537 soil microbial indices, the activity of soil enzymes, and the soil microflora characteristics at the  
538 two sites.

## 539 **References**

- 540 1. Macko S, Wang L, D'Odorico P. Nitrogen uptake preferences by plants in arid and semiarid  
541 ecosystems. In: Proc. AGU Fall Meeting Abstracts. 2005.
- 542 2. Iversen CM, Bridgham SD, Kellogg LE, Scaling plant nitrogen use and uptake efficiencies in  
543 response to nutrient addition in peatlands. *Ecology* 2010; 91(3):693-707. [https://doi.org/10.1890/09-](https://doi.org/10.1890/09-0064.1)  
544 0064.1.
- 545 3. Lebauer DS, Treseder KK. Nitrogen limitation of net primary productivity in terrestrial ecosystems  
546 is globally distributed. *Ecology* 2008; 89(2):371-379.
- 547 4. Shi Y, Sheng L, Wang Z, Zhang X, He N, Yu Q. Responses of soil enzyme activity and microbial  
548 community compositions to nitrogen addition in bulk and microaggregate soil in the temperate  
549 steppe of Inner Mongolia. *Eurasian Soil Sci* 2016; 49(10):1149-1160.  
550 <https://doi.org/10.1134/s1064229316100124>.
- 551 5. Holtgrieve GW, Schindler DE, Hobbs WO, Leavitt PR, Ward EJ, Bunting L, Lisac MJ. A coherent  
552 signature of anthropogenic nitrogen deposition to remote watersheds of the northern hemisphere.  
553 *Science* 2011; 334(6062):1545-1548. <https://doi.org/10.1126/science.1212267>.
- 554 6. Neff JC, Townsend AR, Gleixner G, Lehman SJ, Turnbull J, Bowman WD. Variable effects of  
555 nitrogen additions on the stability and turnover of soil carbon. *Nature* 2002; 419(6910):915-917.  
556 <https://doi.org/10.1038/nature01136>.
- 557 7. Sala OE, Chapin FS, Armesto JJ, Berlow E, Bloomfield J, Dirzo R, et al. Global biodiversity  
558 scenarios for the year 2100. *Science* 2000; 287(5459):1770-1774.  
559 <https://doi.org/10.1126/science.287.5459.1770>.
- 560 8. Wei C, Zheng H, Li Q, Lü X, Yu Q, Zhang H et al. Nitrogen addition regulates soil nematode

- 561 community composition through ammonium suppression. *PLOS One* 2012; 7(8):e43384.  
562 <https://doi.org/10.1371/journal.pone.0043384>.
- 563 9. Lal R. Carbon sequestration in dryland ecosystems. *Environ Manage* 2004, 33(4):528–544.  
564 <https://doi.org/10.1007/s00267-003-9110-9>.
- 565 10. Nielsen UN, Ball BA. Impacts of altered precipitation regimes on soil communities and  
566 biogeochemistry in arid and semi-arid ecosystems. *Global Change Biol* 2015; 21(4):1407-1421.  
567 <https://doi.org/10.1111/gcb.12789>.
- 568 11. Li YQ, Zhao XY, Wang SK, Zhang FX, Lian J, Huang WD. Carbon accumulation in the bulk soil  
569 and different soil fractions during the rehabilitation of desertified grassland in Horqin Sandy Land  
570 (Northern China). *Polish J Ecol* 2015; 63(1):88-101.  
571 <https://doi.org/10.3161/15052249PJE2015.63.1.008>.
- 572 12. Phoenix GK, Leake JR, Read DJ, Grime JP, Lee JA. Accumulation of pollutant nitrogen in  
573 calcareous and acidic grasslands: evidence from N flux and <sup>15</sup>N tracer studies. *Water Air Soil Poll*  
574 2004; 4(6):159-167. <https://doi.org/10.1007/s11267-004-3026-0>.
- 575 13. Stursova M, Crenshaw CL, Sinsabaugh RL. Microbial responses to long-term N deposition in a  
576 semiarid grassland. *Microbial Ecol* 2006; 51(1):90-98. <https://doi.org/10.1007/s00248-005-5156-y>.
- 577 14. Anderson TH. Soil microbial biomass and activity estimations in forest soils. In: Teller A, Mathy P,  
578 Jeffers JNR (eds.) *Responses of Forest Ecosystems to Environmental Changes* Springer, Dordrecht  
579 1992; 738-739.
- 580 15. Liu W, Xu W, Hong J, Wan S. Interannual variability of soil microbial biomass and respiration in  
581 responses to topography, annual burning and N addition in a semiarid temperate steppe. *Geoderma*  
582 2010; 158(3-4):259-267. <https://doi.org/10.1016/j.geoderma.2010.05.004>.

- 583 16. Wang NN, Han DX, Sun X. Effects of precipitation change on soil microbial functional diversity in  
584 the primitive Korean pine and broadleaved forests (in Chinese). *Acta Ecologica Sinica* 2017;  
585 37(3):1-9. <https://doi.org/10.5846/stxb201509101873>.
- 586 17. Jenkinson DS. Microbial biomass in soil: measurement and turnover. *Soil Biol Biochem* 1981;  
587 5:415-471.
- 588 18. Sparling GP. Soil microbial biomass, activity and nutrient cycling as indicators of soil health. In:  
589 Pankhurst CE, Doube BM, Gupta VVSR (Eds.) *Biological Indicators of Soil Health*, CABI,  
590 Wallington. 1997; pp: 97-119.
- 591 19. Powlson DS, Hirsch PR, Brookes PC. The role of soil microorganisms in soil organic matter  
592 conservation in the tropics. *Nutr Cycl Agroecosys* 2001; 61(1-2):41-51.  
593 <https://doi.org/10.1023/A:1013338028454>.
- 594 20. Pan F, Zhang W, LiangY, Liu S, Wang K. Increased associated effects of topography and litter and  
595 soil nutrients on soil enzyme activities and microbial biomass along vegetation successions in karst  
596 ecosystem, southwestern China. *Environmental Science and Pollution Research* 2018;  
597 25(17):16979-16990. <https://doi.org/10.1007/s11356-018-1673-3>.
- 598 21. Keeler BL, Hobbie SE, Kellogg LE. Effects of long-term nitrogen addition on microbial enzyme  
599 activity in eight forested and grassland sites: implications for litter and soil organic matter  
600 decomposition. *Ecosystems* 2009; 12(1):1-15. <https://doi.org/10.1007/s10021-008-9199-z>.
- 601 22. Spohn M, Pötsch EM, Eichorst SA, Woebken D, Wanek W, Richter A. Soil microbial carbon use  
602 efficiency and biomass turnover in a long-term fertilization experiment in a temperate grassland.  
603 *Soil Biol Biochem* 2016; 97:168-175. <https://doi.org/10.1016/j.soilbio.2016.03.008>.
- 604 23. Liu HM, Zhang HF, Huangfu CH, Jie LI, Zhou GF, Yang DL, et al. Effects of different long-term

- 605 nitrogen addition on soil microbial diversity of *Stipa baicalensis* steppe in Inner Mongolia, China  
606 (in Chinese). *J Agric Environ Sci* 2017; 36:709-717.
- 607 24. Li LJ, Zeng DH, Yu ZY, Fan ZP, Mao R. Soil microbial properties under N and P additions in a  
608 semi-arid, sandy grassland. *Biol Fert Soils* 2010; 46(6):653-658. [https://doi.org/10.1007/s00374-](https://doi.org/10.1007/s00374-010-0463-y)  
609 010-0463-y.
- 610 25. Zhou XB, Zhang YB, Downing A. Non-linear response of microbial activity across a gradient of  
611 nitrogen addition to a soil from the Gurbantunggut Desert, northwestern China. *Soil Biol Biochem*  
612 2012; 47:67-77. <https://doi.org/10.1016/j.soilbio.2011.05.012>.
- 613 26. Treseder KK. Nitrogen additions and microbial biomass: a meta-analysis of ecosystem studies. *Ecol*  
614 *Lett* 2008; 11(10):1111-1120. <https://doi.org/10.1111/j.1461-0248.2008.01230.x>.
- 615 27. McCrackin ML, Harms TK, Grimm NB, Hall SJ, Kaye JP. Responses of soil microorganisms to  
616 resource availability in urban, desert soils. *Biogeochemistry* 2008; 87:43-155.  
617 <https://doi.org/10.1007/s10533-007-9173-4>.
- 618 28. Triebwasser DJ, Tharayil N, Preston CM, Gerard PD. The susceptibility of soil enzymes to  
619 inhibition by leaf litter tannins is dependent on the tannin chemistry, enzyme class and vegetation  
620 history. *New Phytologist* 2012; 196(4):1122-1132. [https://doi.org/10.1111/j.1469-](https://doi.org/10.1111/j.1469-8137.2012.04333.x)  
621 8137.2012.04333.x.
- 622 29. Zhou X, Wang SS, Chen C. Modeling the effects of tree species and incubation temperature on soil's  
623 extracellular enzyme activity in 78-year-old tree plantations. *Biogeoscience* 2017; 14(23):5393-  
624 5402. <https://doi.org/10.5194/bg-14-5393-2017>.
- 625 30. Allison SD, Jastrow JD. Activities of extracellular enzymes in physically isolated fractions of  
626 restored grassland soils. *Soil Biol Biochem*, 2006; 38(11): 3245-3256.

- 627 <https://doi.org/10.1016/j.soilbio.2006.04.011>.
- 628 31. Brunner K, Peterbauer CK, Mach RL, Lorito M, Zeilinger S, Kubicek CK, et al. The NagI N-  
629 acetylglucosaminidase of *Trichoderma atroviride* is essential for chitinase induction by chitin and  
630 of major relevance to biocontrol. *Curr Genet* 2003; 43(4):289-295. [https://doi.org/10.1007/s00294-](https://doi.org/10.1007/s00294-003-0399-y)  
631 [003-0399-y](https://doi.org/10.1007/s00294-003-0399-y)
- 632 32. Zhou LK. *Soil Enzymology* (in Chinese). Science Press. Beijing. 1987; pp: 116-206.
- 633 33. Niu XY, Sun XM, Chen DS, Zhang SG. Soil enzyme activities of the litter in *Larix kaempferi*  
634 plantation (in Chinese). *Scientia Silvae Sinicae* 2015; 51(4):16-25. [https://doi.org/10.11707](https://doi.org/10.11707/j.1001-7488.20150403)  
635 [/j.1001-7488.20150403](https://doi.org/10.11707/j.1001-7488.20150403).
- 636 34. Jia YL, Yu GR, He NP, Zhan XY, Fang HJ, Sheng WP, et al. Spatial and decadal variations in  
637 inorganic nitrogen wet deposition in China induced by human activity. *Scientific reports* 2014;  
638 4(3763):1-7. <https://doi.org/10.1038/srep03763>.
- 639 35. Joergensen RG. The fumigation-extraction method to estimate soil microbial biomass: calibration  
640 of the kEC value. *Soil Biol Biochem* 1996; 28(1):25-31. [https://doi.org/10.1016/0038-](https://doi.org/10.1016/0038-0717(95)00102-6)  
641 [0717\(95\)00102-6](https://doi.org/10.1016/0038-0717(95)00102-6).
- 642 36. Xu N, Tan G, Wang H, Gai X. Effect of biochar additions to soil on nitrogen leaching, microbial  
643 biomass and bacterial community structure. *Eur. J. Soil Biol.* 2016; 74, 1-8.  
644 <https://doi.org/10.1016/j.ejsobi.2016.02.004>.
- 645 37. Adams RI, Miletto M, Taylor JW, Bruns TD. Dispersal in microbes: fungi in indoor air are  
646 dominated by outdoor air and show dispersal limitation at short distances. *ISME Journal* 2013;  
647 7(7):1262-1273. <https://doi.org/10.1038/ismej.2013.28>.
- 648 38. Quast C, Pruesse E, Yilmaz P, Gerken J, Schweer T, Yarza P, et al. The SILVA ribosomal RNA



- 649 gene database project: improved data processing and web-based tools. *Nucleic Acids Res* 2013;  
650 41(D1):590-596. <https://doi.org/10.1093/nar/gks1219>.
- 651 39. Schloss PD, Westcott SL, Ryabin T, Hall JR, Hartmann M, Hollister EB, et al. Introducing mothur:  
652 open-source, platform-independent, community-supported software for describing and comparing  
653 microbial communities. *Appl Environ Microbiol* 2009; 75(23):7537-7541.  
654 <https://doi.org/10.1128/AEM.01541-09>.
- 655 40. Barbhuiya AR, Arunachalam A, Pandey HN, Arunachalam K, Khan ML, Nath PC. Dynamics of  
656 soil microbial biomass C, N and P in disturbed and undisturbed stands of a tropical wet-evergreen  
657 forest. *Eur J Soil Biol* 2004; 40(3-4):113-121. <https://doi.org/10.1016/j.ejsobi.2005.02.003>.
- 658 41. Jefferies RL, Walker NA, Edwards KA, Dainty J. Is the decline of soil microbial biomass in late  
659 winter coupled to changes in the physical state of cold soils? *Soil Biol Biochem* 2010; 42(2):129-  
660 135. <https://doi.org/10.1016/j.soilbio.2009.10.008>.
- 661 42. Jaeger IICH, Monson RK, Fisk MC, Schmidt SK. Seasonal partitioning of nitrogen by plants and  
662 soil microorganisms in an alpine ecosystem. *Ecology* 1999; 80(6):1883-1891.  
663 <https://doi.org/10.2307/1766666>.
- 664 43. Johnson D, Leake JR, Read DJ. Liming and nitrogen fertilization affects phosphatase activities,  
665 microbial biomass and mycorrhizal colonisation in upland grassland. *Plant Soil* 2005; 271(1-2):157-  
666 164. <https://doi.org/10.1007/s11104-004-2267-z>.
- 667 44. Stark S, Kytöviita MM. Simulated grazer effects on microbial respiration in a subarctic meadow:  
668 implications for nutrient competition between plants and soil microorganisms. *Applied Soil Ecology*  
669 2006; 31:20-31. <https://doi.org/10.1016/j.apsoil.2005.04.002>.
- 670 45. Liu W, Xu W, Han Y, Wang C, Wan S. Responses of microbial biomass and respiration of soil to

- 671 topography, burning, and nitrogen fertilization in a temperate steppe. *Biol Fert Soils* 2007;  
672 44(2):259-268. <https://doi.org/10.1007/s00374-007-0198-6>.
- 673 46. Lovell RD, Jarvis SC, Bardgett RD. Soil microbial biomass and activity in long-term grassland:  
674 effects of management changes. *Soil Biol Biochem* 1995; 27(7):969-975.  
675 [https://doi.org/10.1016/0038-0717\(94\)00241-R](https://doi.org/10.1016/0038-0717(94)00241-R).
- 676 47. Compton JE, Watrud LS, Porteous LA, DeGroot S. Response of soil microbial biomass and  
677 community composition to chronic nitrogen additions at Harvard forest. *Forest Ecol Manag* 2004;  
678 196(1):143-158. [https://doi.org/10.1016/S0378-1127\(04\)00197-5](https://doi.org/10.1016/S0378-1127(04)00197-5).
- 679 48. Wallenstein MD, McNulty S, Fernandez IJ, Boggs J, Schlesinger WH. Nitrogen fertilization  
680 decreases forest soil fungal and bacterial biomass in three long-term experiments. *For Ecol Manage*  
681 2006; 222(1-3):459-468. <https://doi.org/v10.1016/j.foreco.2005.11.002>.
- 682 49. Bakken LR. Microbial growth and immobilization/mineralization of N in the rhizosphere. *Symbiosis*  
683 1990; 9:37-41.
- 684 50. Liu W, Jiang L, Hu S, Li L, Liu L, Wan S. Decoupling of soil microbes and plants with increasing  
685 anthropogenic nitrogen inputs in a temperate steppe. *Soil Biol Biochem* 2014; 72:116–122.  
686 <https://doi.org/10.1016/j.soilbio.2014.01.022>.
- 687 51. Zhang J, Ai Z, Liang C, Wang G, Xue S. Response of soil microbial communities and nitrogen  
688 thresholds of *Bothriochloa ischaemum*, to short-term nitrogen addition on the Loess Plateau.  
689 *Geoderma* 2017; 308:112-119. <https://doi.org/10.1016/j.geoderma.2017.08.034>.
- 690 52. Dijkstra FA, Hobbie SE, Reich PB, Knops JM. Divergent effects of elevated CO<sub>2</sub>, N fertilization,  
691 and plant diversity on soil C and N dynamics in a grassland field experiment. *Plant Soil* 2005;  
692 272:41-52. <https://doi.org/10.1007/s11104-004-3848-6>.

- 693 53. Liu YL, Liu XL, Xu F, Wu YN, Li Z J. Numerical simulation of plant roots protection effects on the  
694 silty clays slope with low liquid limit. Sixth International Conference on Intelligent Systems Design  
695 and Engineering Applications (ISDEA). IEEE2016; pp: 533-537
- 696 54. Zeglin LH, Stursova M, Collins SSL. Microbial responses to nitrogen addition in three contrasting  
697 grassland ecosystems. *Oecologia* 2007; 154(2):349-359. [https://doi.org/10.1007/s00442-007-0836-](https://doi.org/10.1007/s00442-007-0836-6)  
698 6.
- 699 55. Saiya-Cork KR, Sinsabaugh RL, Zak DR. The effects of long term nitrogen deposition on  
700 extracellular enzyme activity in an *Acer saccharum* forest soil. *Soil Biol Biochem* 2002; 34(9):1309-  
701 1315. [https://doi.org/10.1016/S0038-0717\(02\)00074-3](https://doi.org/10.1016/S0038-0717(02)00074-3).
- 702 56. Henry HAL, Juarez JD, Field CB, Vitousek PM. Interactive effects of elevated CO<sub>2</sub>, N deposition  
703 and climate change on extracellular enzyme activity and soil density fractionation in a California  
704 annual grassland. *Soil Biol Biochem* 2005; 11(10):1808-1815. [https://doi.org/10.1111/j.1365-](https://doi.org/10.1111/j.1365-2486.2005.001007.x)  
705 2486.2005.001007.x.
- 706 57. Wang B, Xue S, Liu GB, Zhang GH, Li G, Ren ZP. Changes in soil nutrient and enzyme activities  
707 under different vegetation in the Loess Plateau area, northwest China. *Catena* 2012; 92:186-195.  
708 <https://doi.org/10.1016/j.catena.2011.12.004>.
- 709 58. Pan FJ, Liang YM, Zhang W, Zhao J, Wang KL. Enhanced nitrogen availability in karst ecosystems  
710 by oxalic acid release in the rhizosphere. *Front Plant Sci* 2016; 7(11636):687.  
711 <https://doi.org/10.3389/fpls.2016.00687>.
- 712 59. Creamer CA, Filley TR, Olk DC, Stott DE, Dooling V, Boutton TW. Changes to soil organic N  
713 dynamics with leguminous woody plant encroachment into grasslands. *Biogeochemistry* 2013;  
714 113(1-3):307-321. <https://doi.org/10.1007/s10533-012-9757-5>.

- 715 60. Yang S. Effects of water and fertilizer addition on soil microbial characteristics in a typical grassland  
716 of Inner Mongolia (in Chinese). Dissertation. Shenyang University 2014.
- 717 61. Stark CH, Condron LM, O'Callaghan M, Stewart A, Di HJ. Differences in soil enzyme activities,  
718 microbial community structure and short-term nitrogen mineralisation resulting from farm  
719 management history and organic matter amendments. *Soil Biol Biochem* 2008; 40(6):352-1363.  
720 <https://doi.org/10.1016/j.soilbio.2007.09.025>.
- 721 62. Wang R, Filley TR, Xu Z, Wang X, Li MH, Zhang Y et al. Coupled response of soil carbon and  
722 nitrogen pools and enzyme activities to nitrogen and water addition in a semi-arid grassland of Inner  
723 Mongolia. *Plant Soil* 2014; 381:323-336. <https://doi.org/10.5194/bg-14-2155-2017>.
- 724 63. Zhang TA, Chen-Han, YH, Ruan HH. Global negative effects of nitrogen deposition on soil  
725 microbes. *ISME Journal* 2018; 12(7):1817-1825. <https://doi.org/10.1038/s41396-018-0096-y>.
- 726 **64.** Griffiths BS, Philippot L. Insights into the resistance and resilience of the soil microbial community.  
727 *FEMS Microbiology Reviews* 2013; 37(2):112-129. [https://doi.org/10.1111/j.1574-](https://doi.org/10.1111/j.1574-6976.2012.00343.x)  
728 [6976.2012.00343.x](https://doi.org/10.1111/j.1574-6976.2012.00343.x).
- 729 65. He JZ, Li J, Zheng YM. Thoughts on the microbial diversity-stability relationship in soil ecosystems  
730 (in Chinese). *Biodiversity Science* 2013; 21(4):411-420.  
731 <https://doi.org/10.3724/SP.J.1003.2013.10033>.
- 732 66. Bardgett RD, Denton CS, Cook R. Below-ground herbivory promotes soil nutrient transfer and root  
733 growth in grassland. *Ecology Letters* 1999a; 2(6):357-360. [https://doi.org/10.1046/j.1461-](https://doi.org/10.1046/j.1461-0248.1999.00001.x)  
734 [0248.1999.00001.x](https://doi.org/10.1046/j.1461-0248.1999.00001.x).
- 735 67. Frey SD, Knorr M, Parrent JL, Simpson RT. Chronic nitrogen enrichment affects the structure and  
736 function of the soil microbial community in temperate hardwood pine forests. *For Ecol Manage*

- 737 2004; 196(1):159-171. <https://doi.org/10.1016/j.foreco.2004.03.018>.
- 738 68. Smolander A, Kurka A, Kitunen V, Mälkönen E. Microbial biomass C and N, and respiratory  
739 activity in soil of repeatedly limed and N and P-fertilized Norway spruce stands. *Soil Biol Biochem*  
740 1994; 26(8):957-962. [https://doi.org/10.1016/0038-0717\(94\)90109-0](https://doi.org/10.1016/0038-0717(94)90109-0).
- 741 69. Bardgett RD, Lovell RD, Hobbs PJ, Jarvis SC. Seasonal changes in soil microbial communities  
742 along a fertility gradient of temperate grasslands. *Soil Biol Biochem* 1999b; 31(7):1021-1030.  
743 [https://doi.org/10.1016/S0038-0717\(99\)00016-4](https://doi.org/10.1016/S0038-0717(99)00016-4).
- 744 70. Yoshida LC, Allen EB. Response to ammonium and nitrate by a mycorrhizal annual invasive grass  
745 and native shrub in southern California. *Am J Bot* 2001; 88(8):1430-1436.  
746 <https://doi.org/10.2307/3558450>.
- 747 71. Chung H, Zak DR, Reich PB, Ellsworth DS. Plant species richness, elevated CO<sub>2</sub>, and atmospheric  
748 nitrogen deposition alter soil microbial community composition and function. *Global Change Biol*  
749 2007; 13:980-989. <https://doi.org/10.1111/j.1365-2486.2007.01313.x>.

## 751 **Supporting information**

752 **S1 Table. Phylotype coverage and diversity estimation based on the bacterial 16S**  
753 **rRNA gene libraries for the samples from the MiSeq sequencing analysis. Sample**  
754 **names include the site type (G, sandy grassland; S, semi-fixed sandy land) and**  
755 **nitrogen addition treatment: control (CK), no N addition; N5, 5 g N m<sup>-2</sup> yr<sup>-1</sup>; N10, 10 g N**  
756 **m<sup>-2</sup> yr<sup>-1</sup>; N15, 15 g N m<sup>-2</sup> yr<sup>-1</sup>.**

757 **S2 Table Phylotype coverage and diversity estimation based on the fungal ITS**  
758 **rRNA gene libraries for the samples from the MiSeq sequencing analysis. Sample**  
759 **names include the site (G, sandy grassland; S, semi-fixed sandy land) and nitrogen**  
760 **addition treatment: control (CK), no N addition; N5, 5 g N m<sup>-2</sup> yr<sup>-1</sup>; N10, 10 g N m<sup>-2</sup> yr<sup>-1</sup>;**  
761 **N15, 15 g N m<sup>-2</sup> yr<sup>-1</sup>.**

762 **S1 Fig. Rarefaction curves. Rarefaction curves show the number of reads 97%**  
763 **sequence similarity level for the different samples. (A) Bacteria, (B) Fungi. Sample**  
764 **names include the site type (G, sandy grassland; S, semi-fixed sandy land) and**  
765 **nitrogen addition treatment: control (CK), no N addition; N5, 5 g N m<sup>-2</sup> yr<sup>-1</sup>; N10, 10 g N**  
766 **m<sup>-2</sup> yr<sup>-1</sup>; N15, 15 g N m<sup>-2</sup> yr<sup>-1</sup>.**

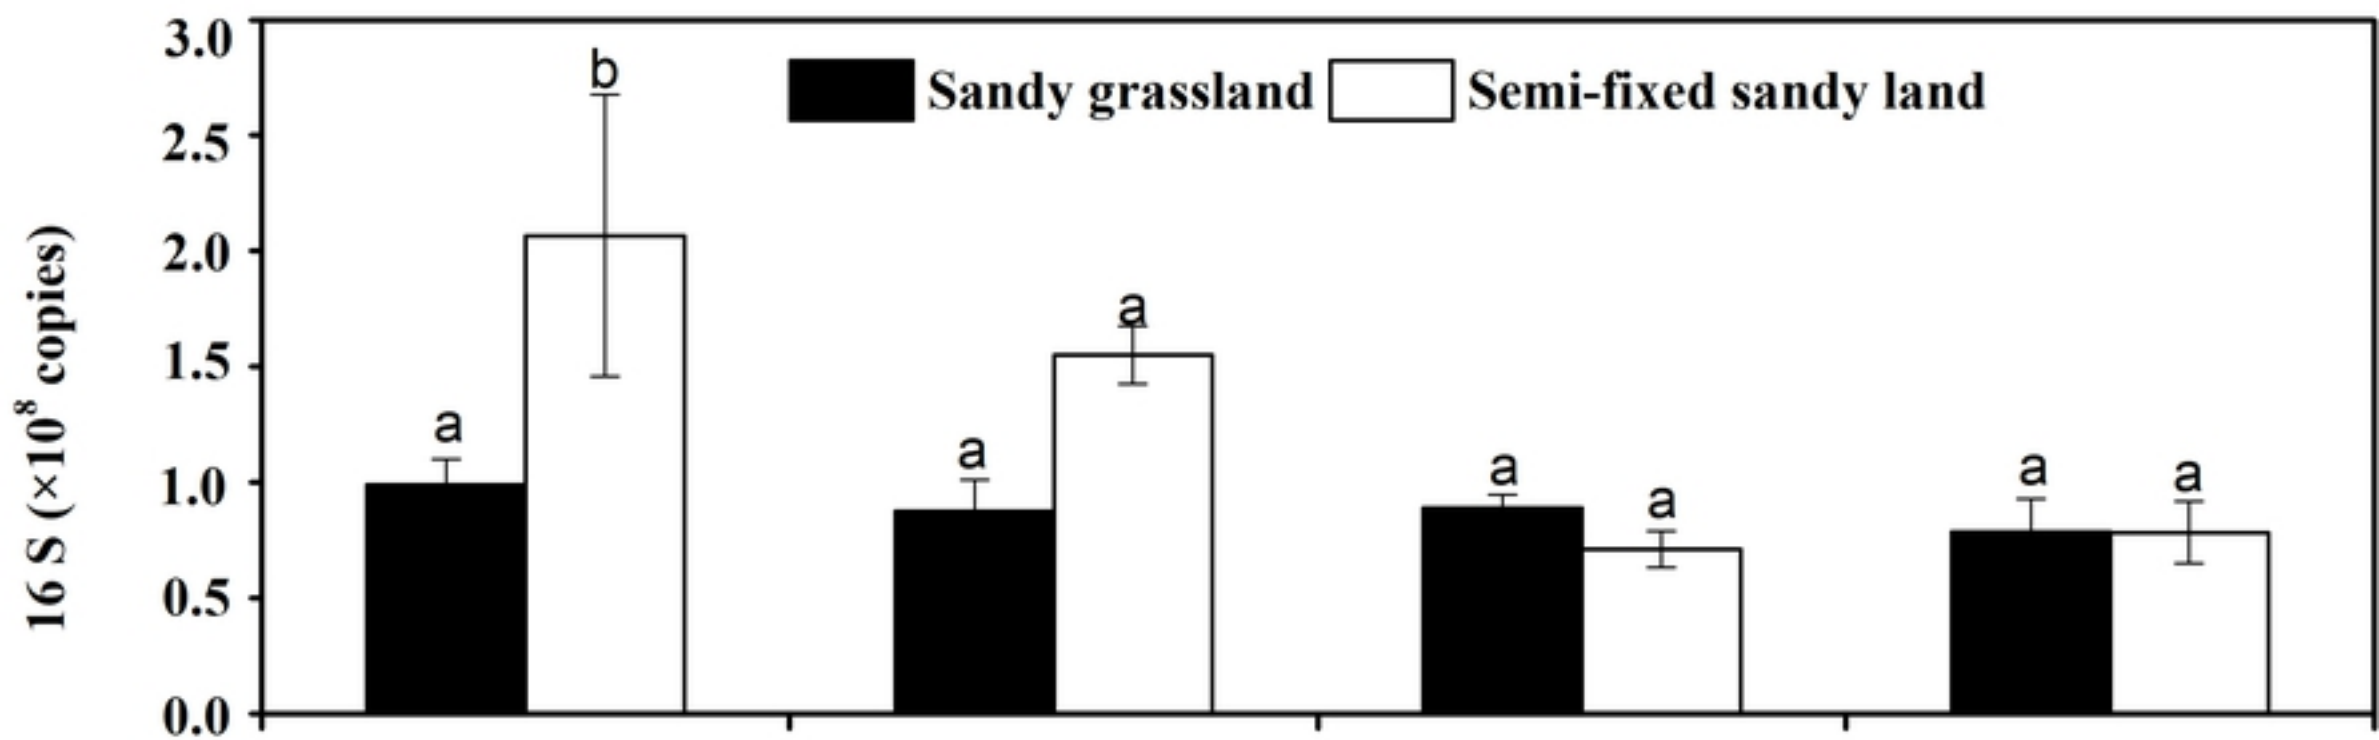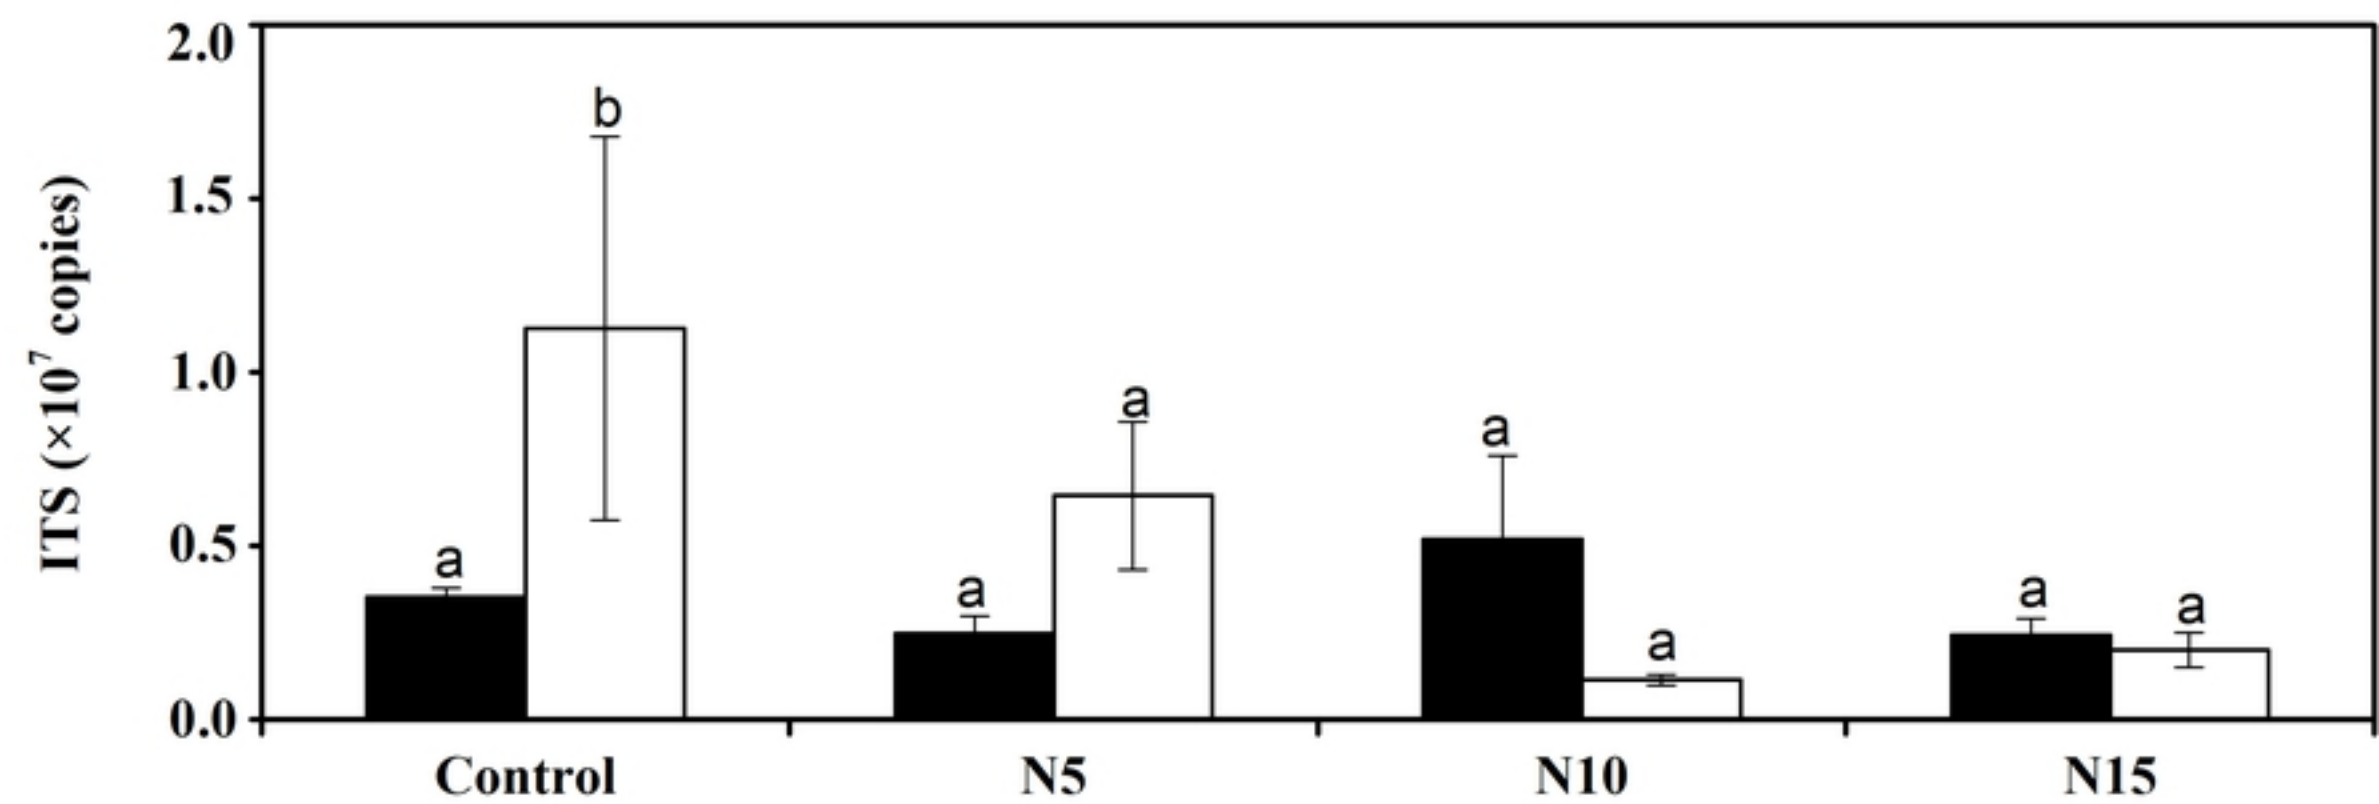

A

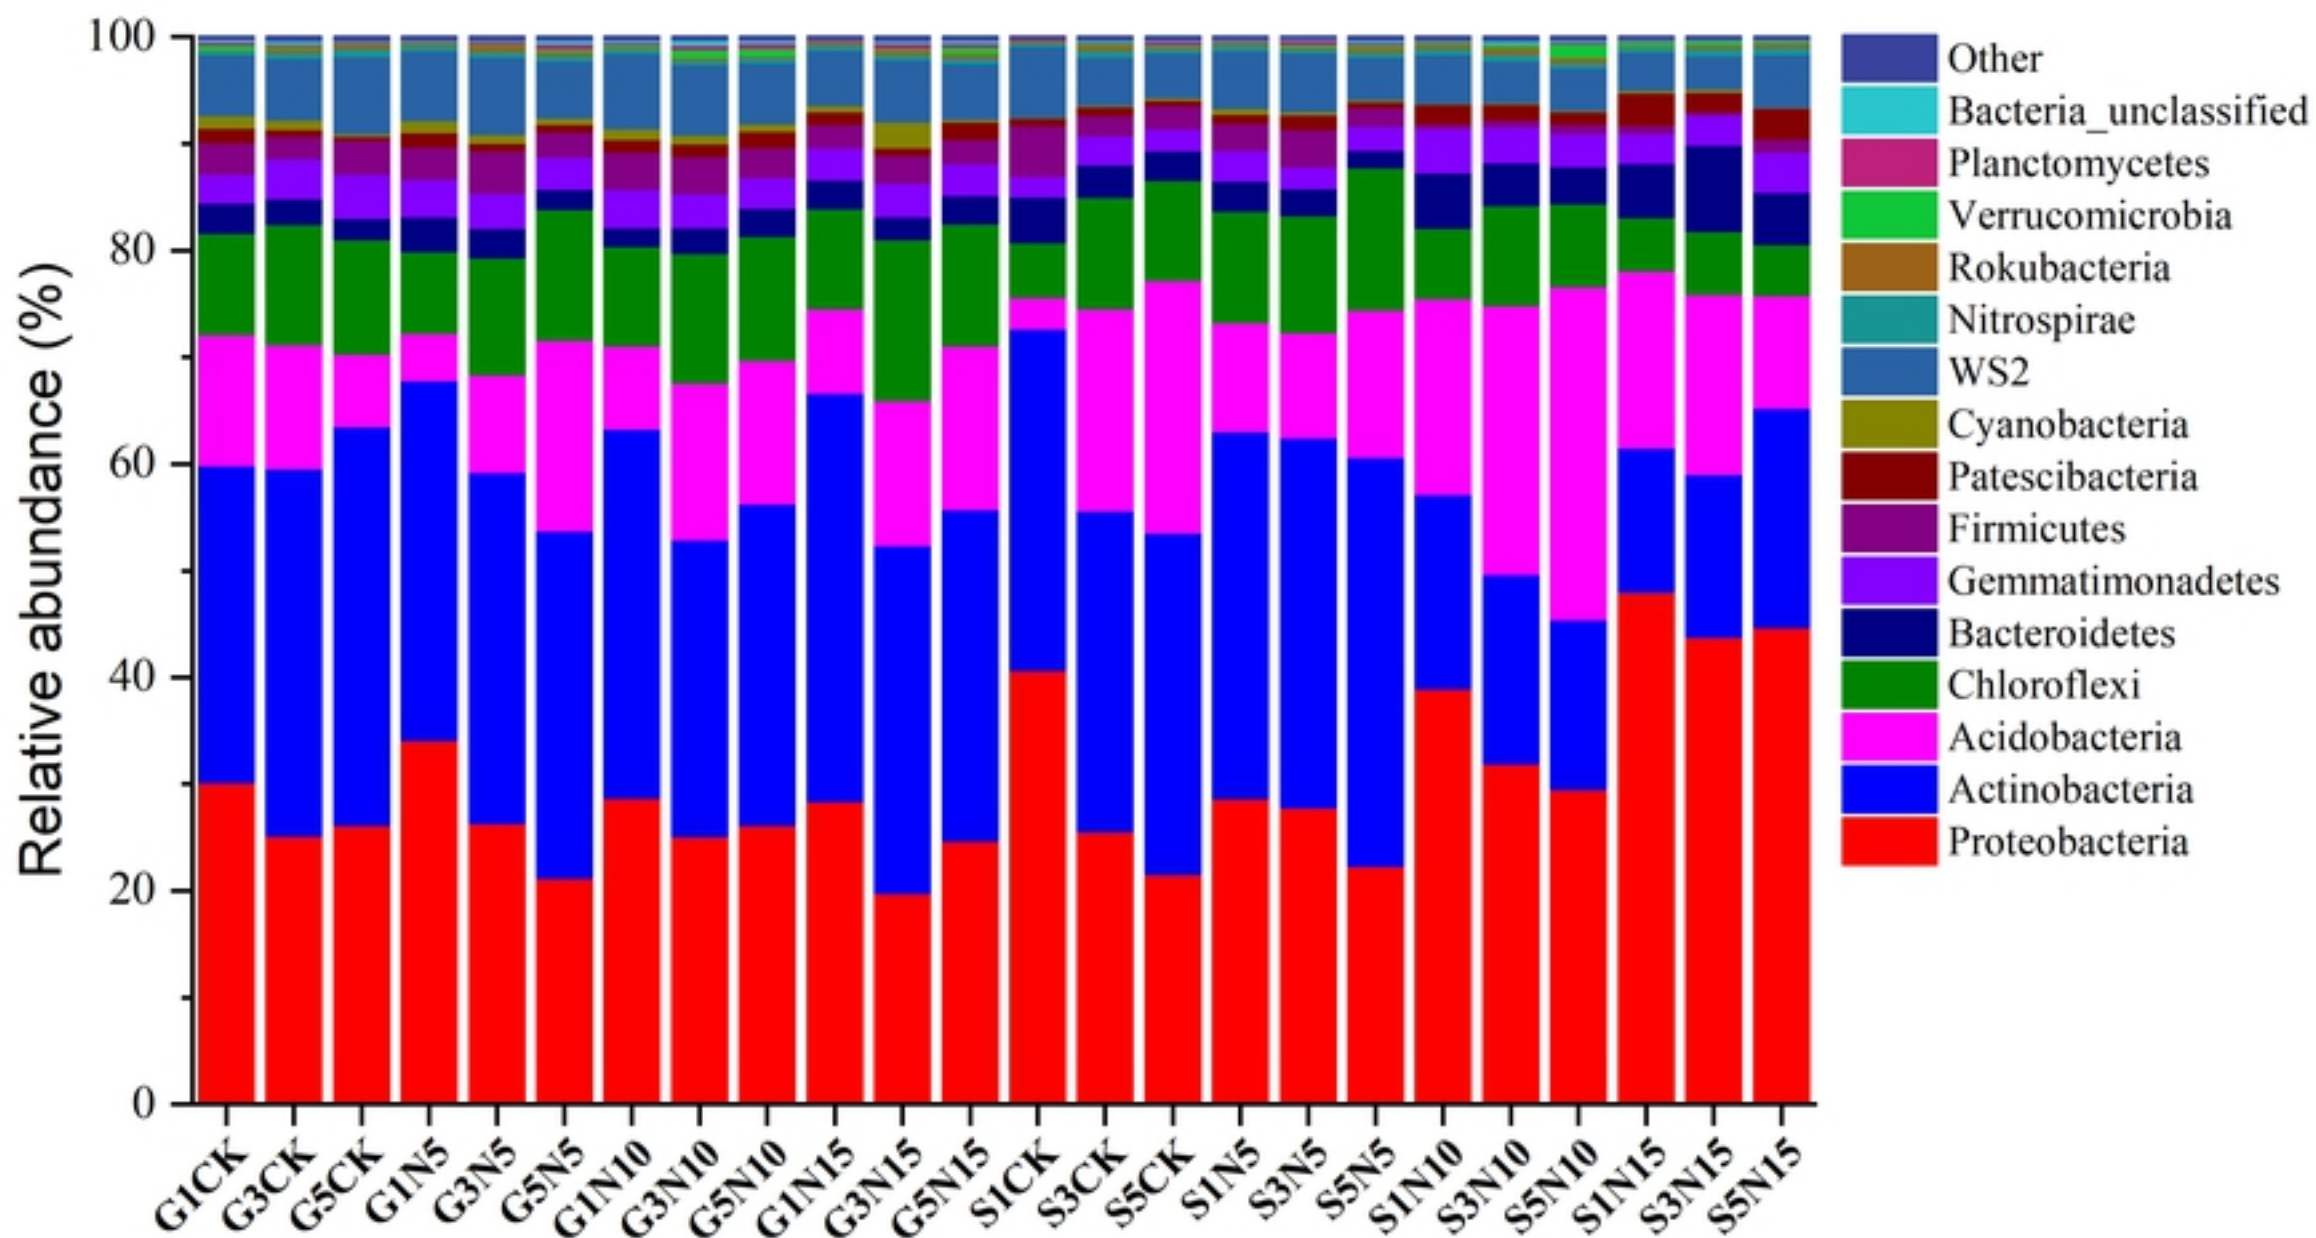



B

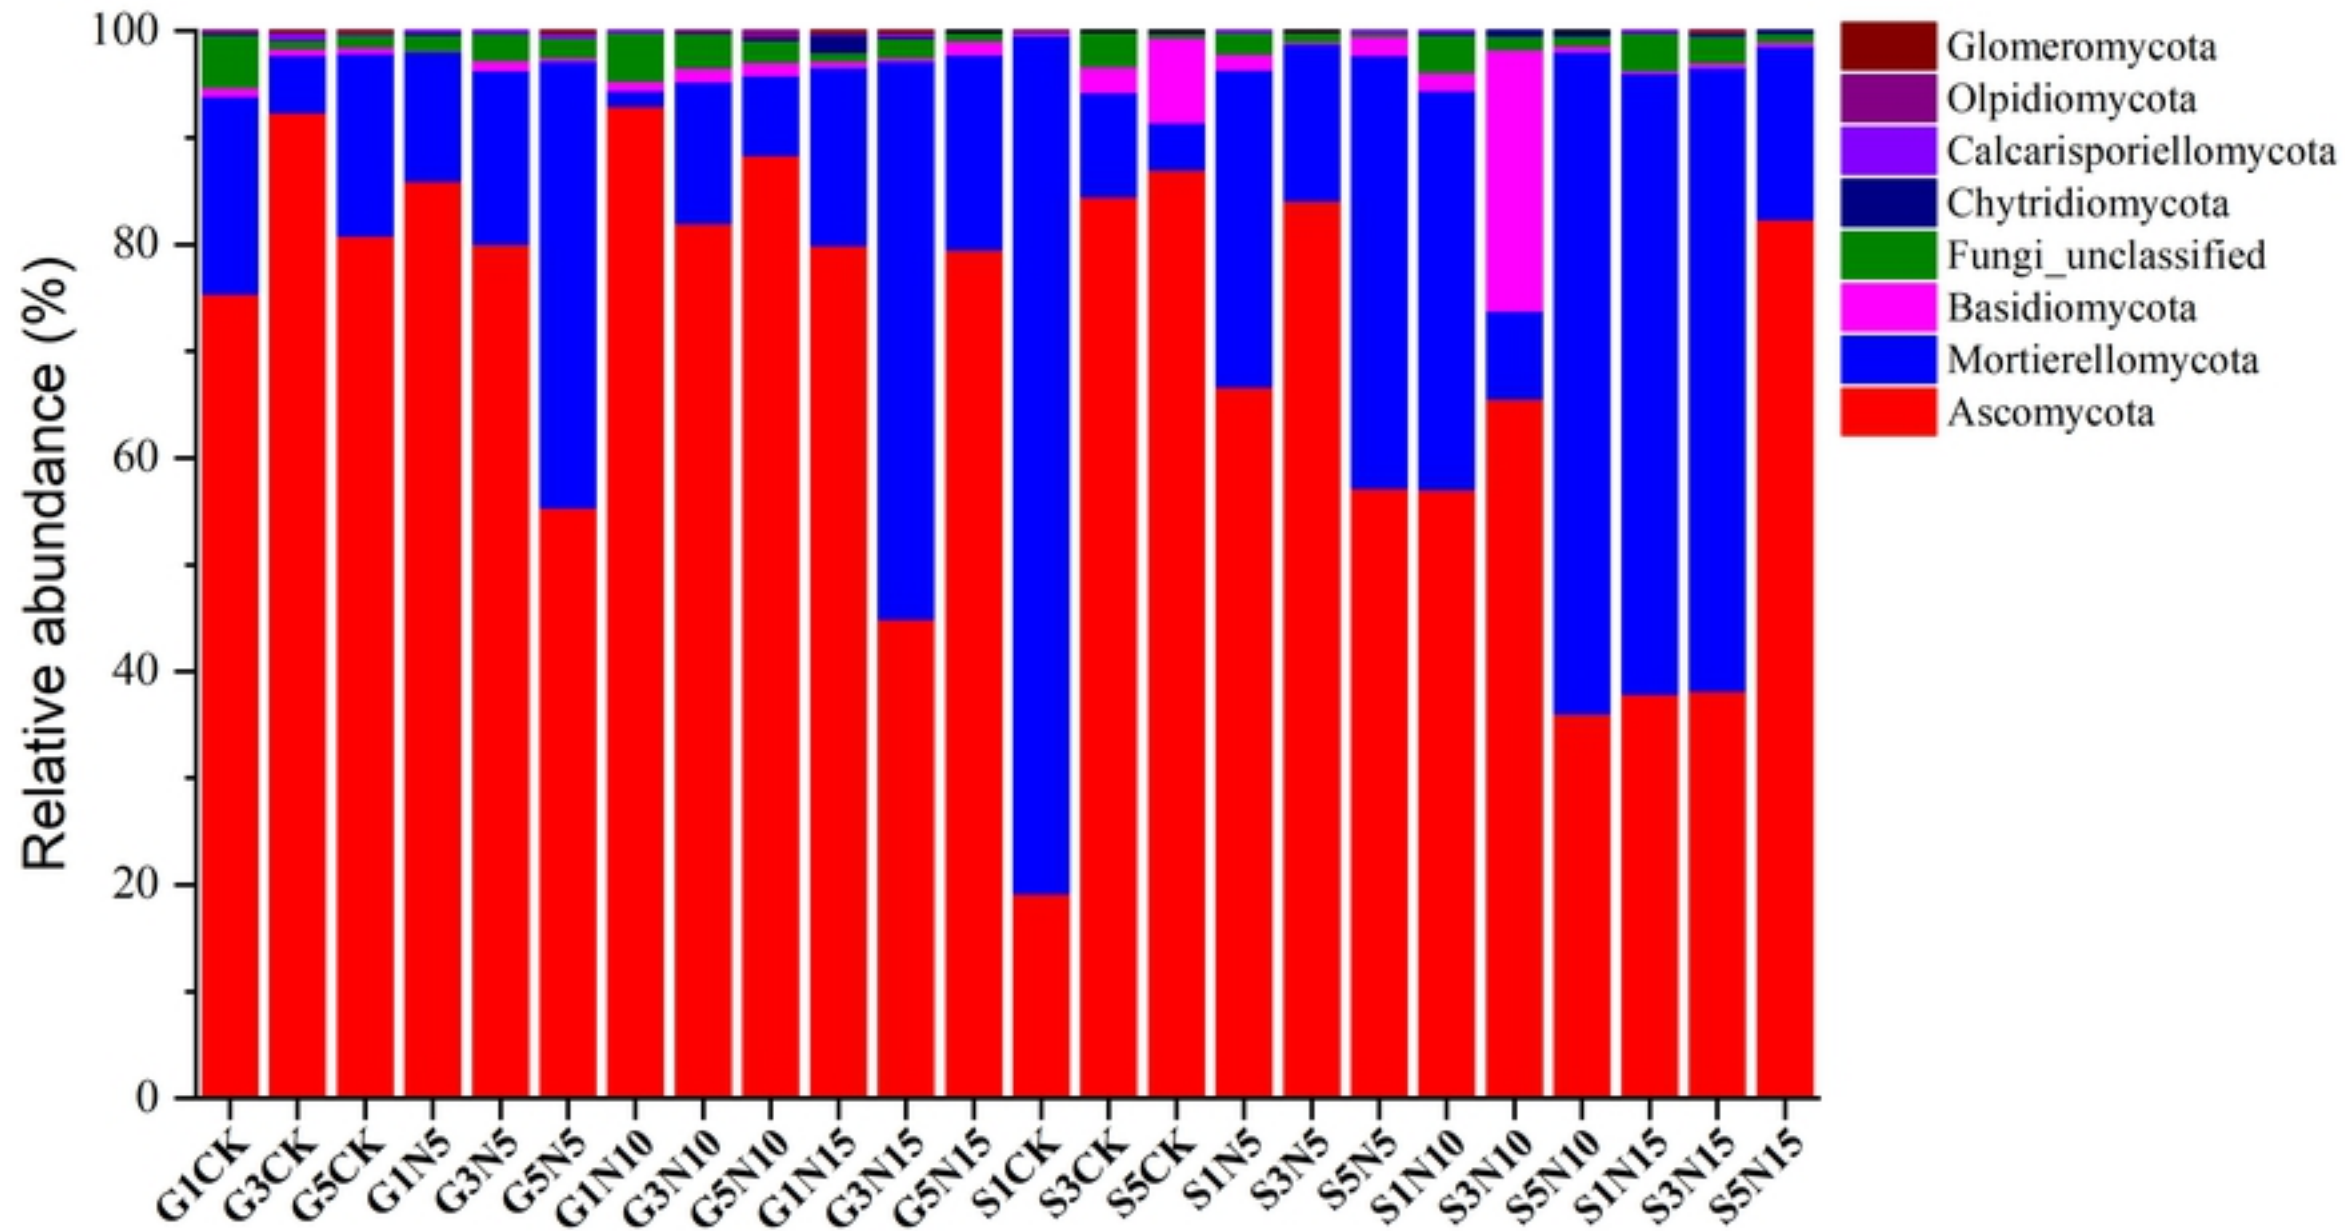

**A**

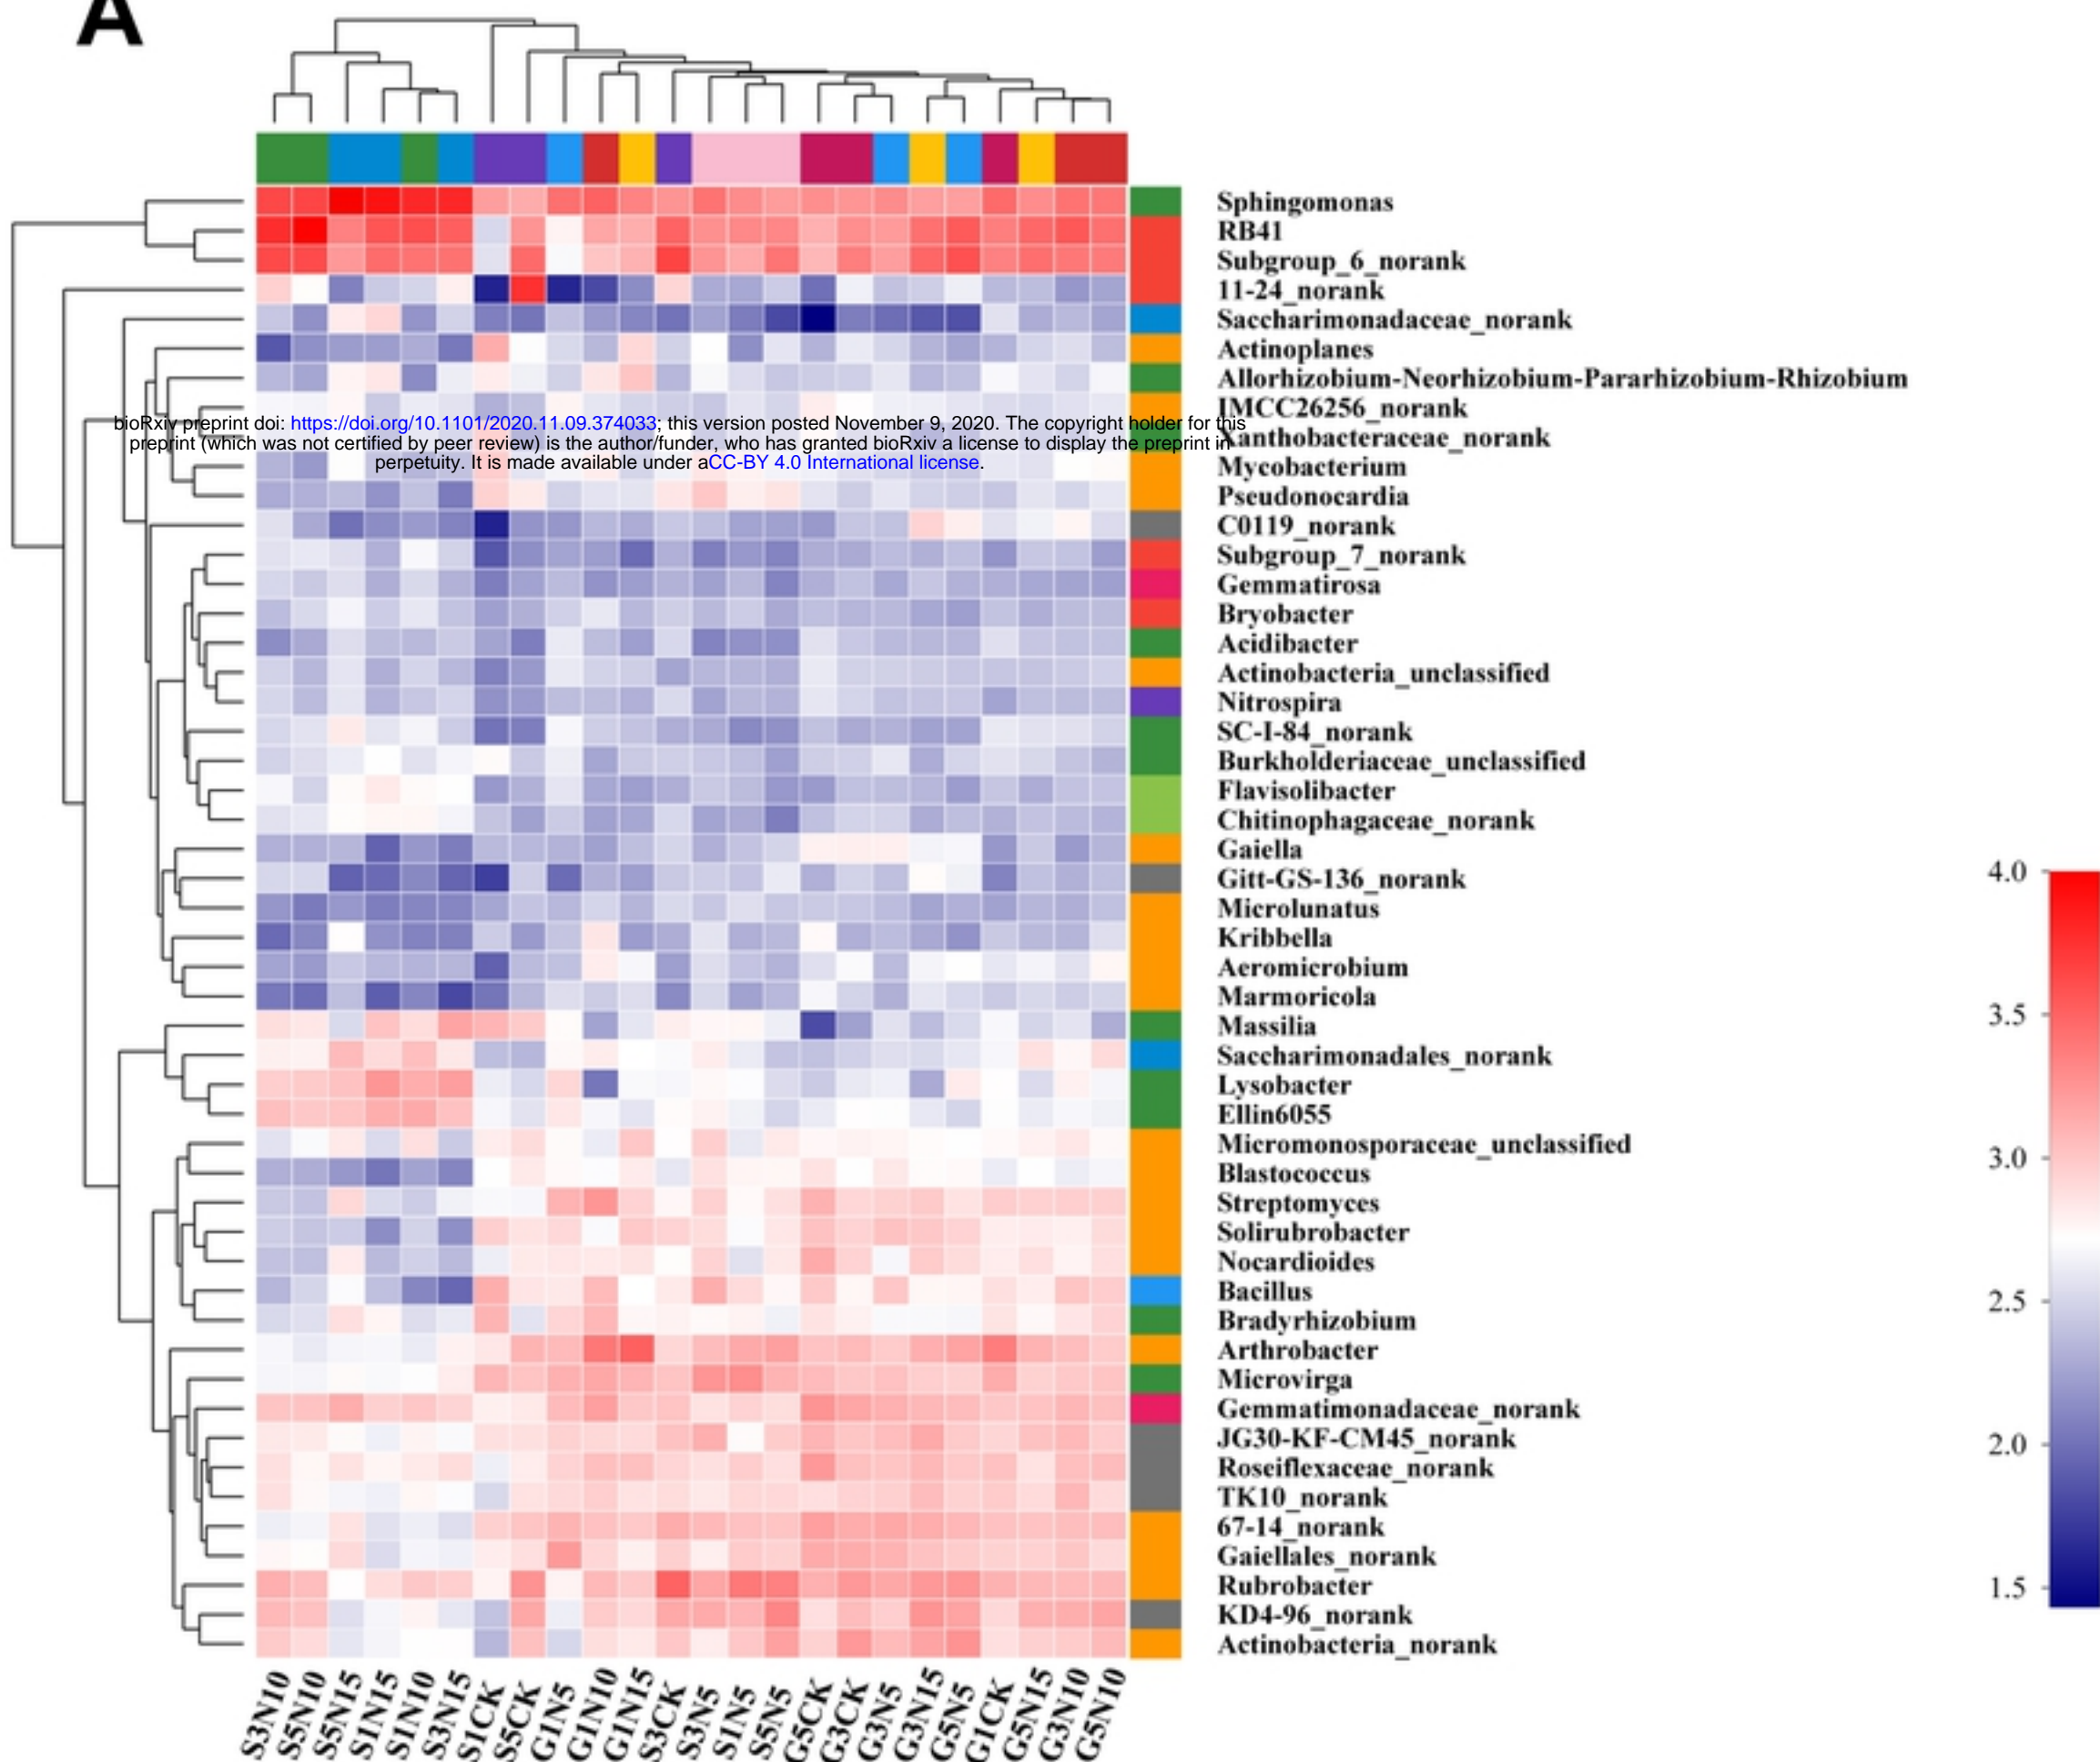

**Sample group**

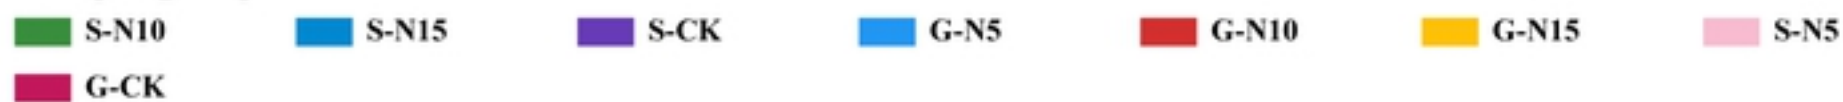

**Taxon group**

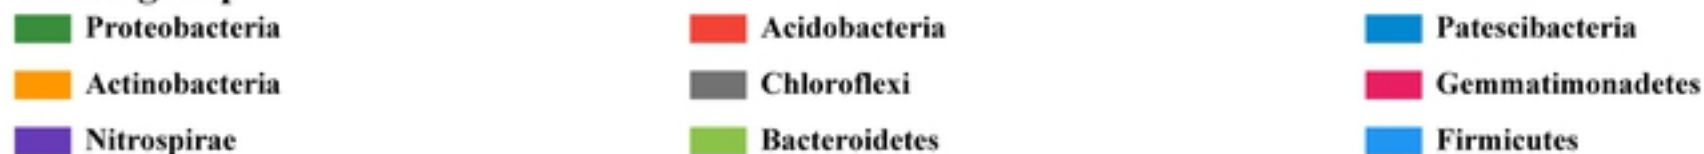

**B**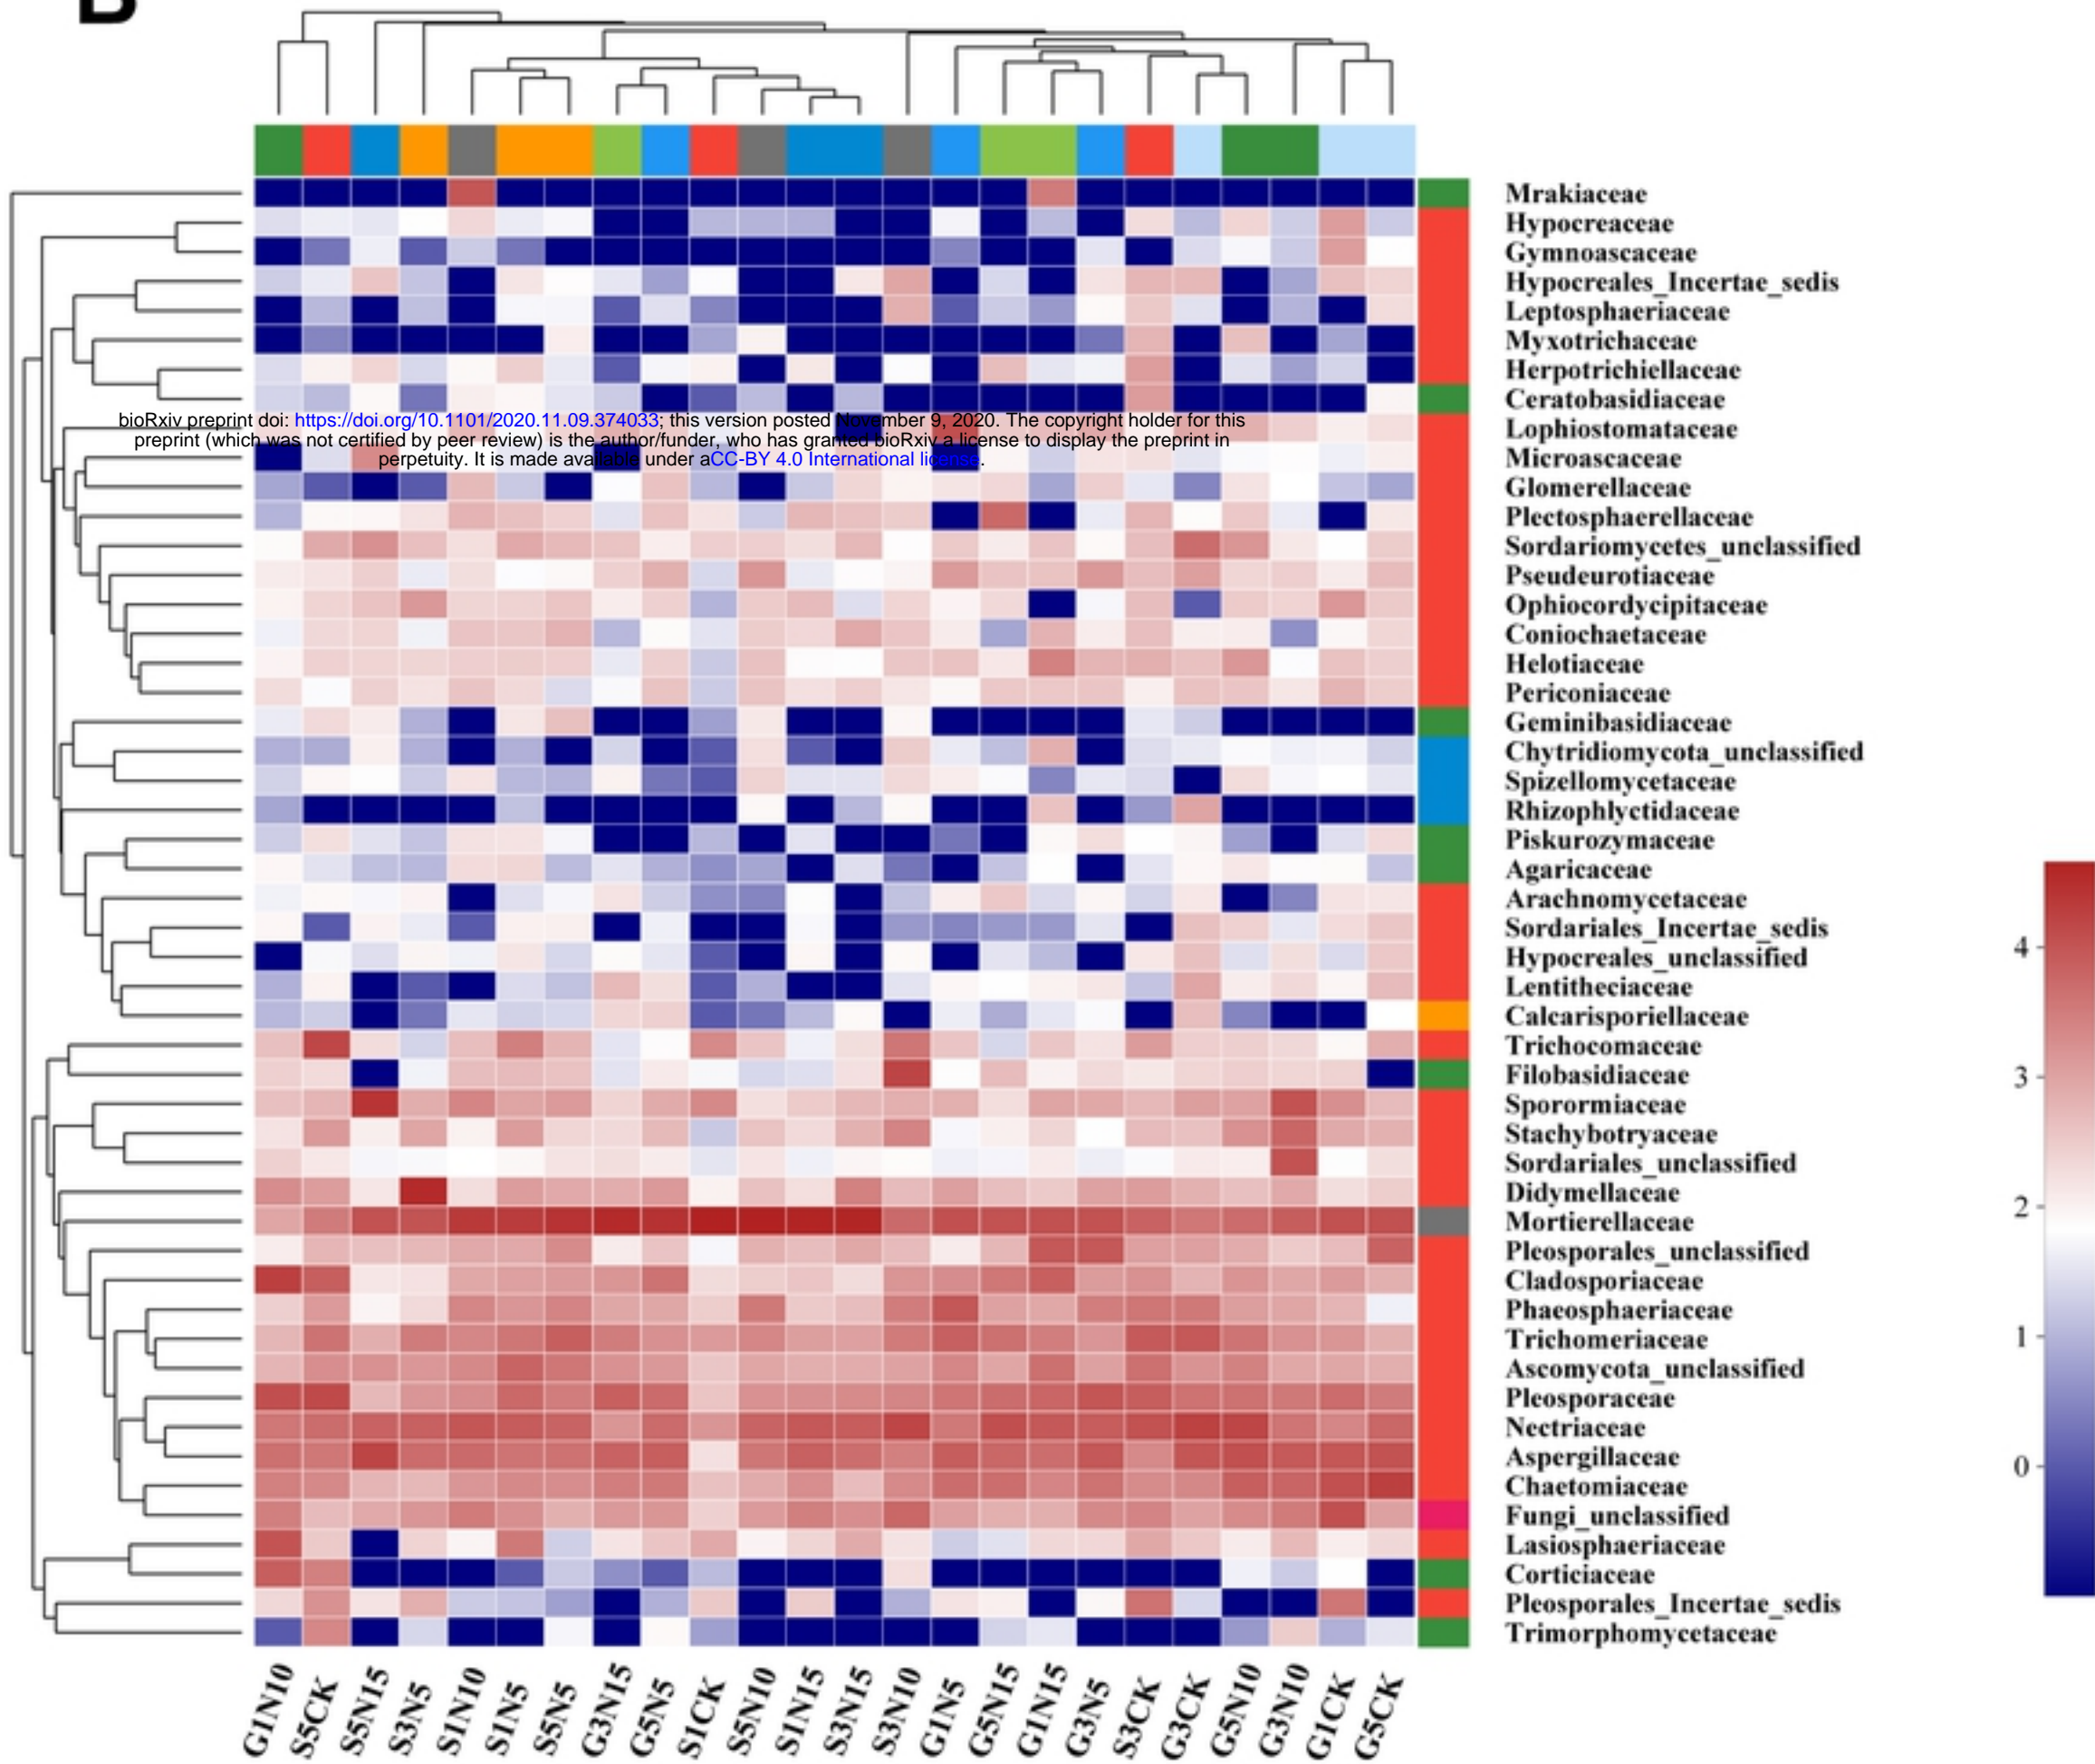**Sample group**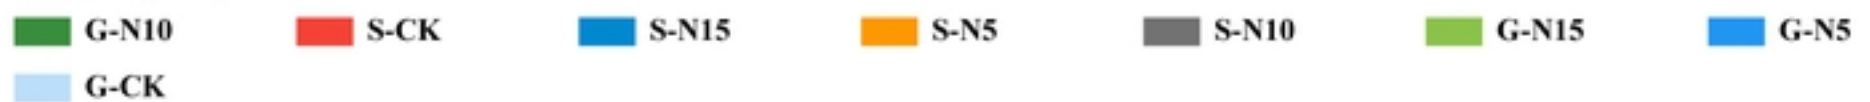**Taxon group**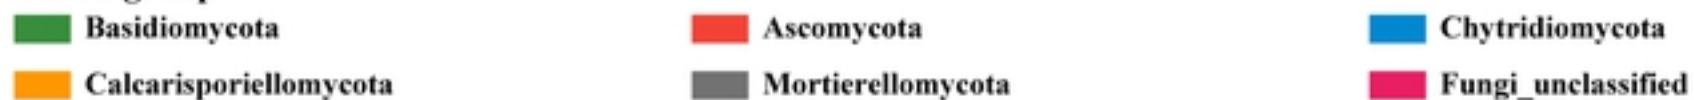



**A**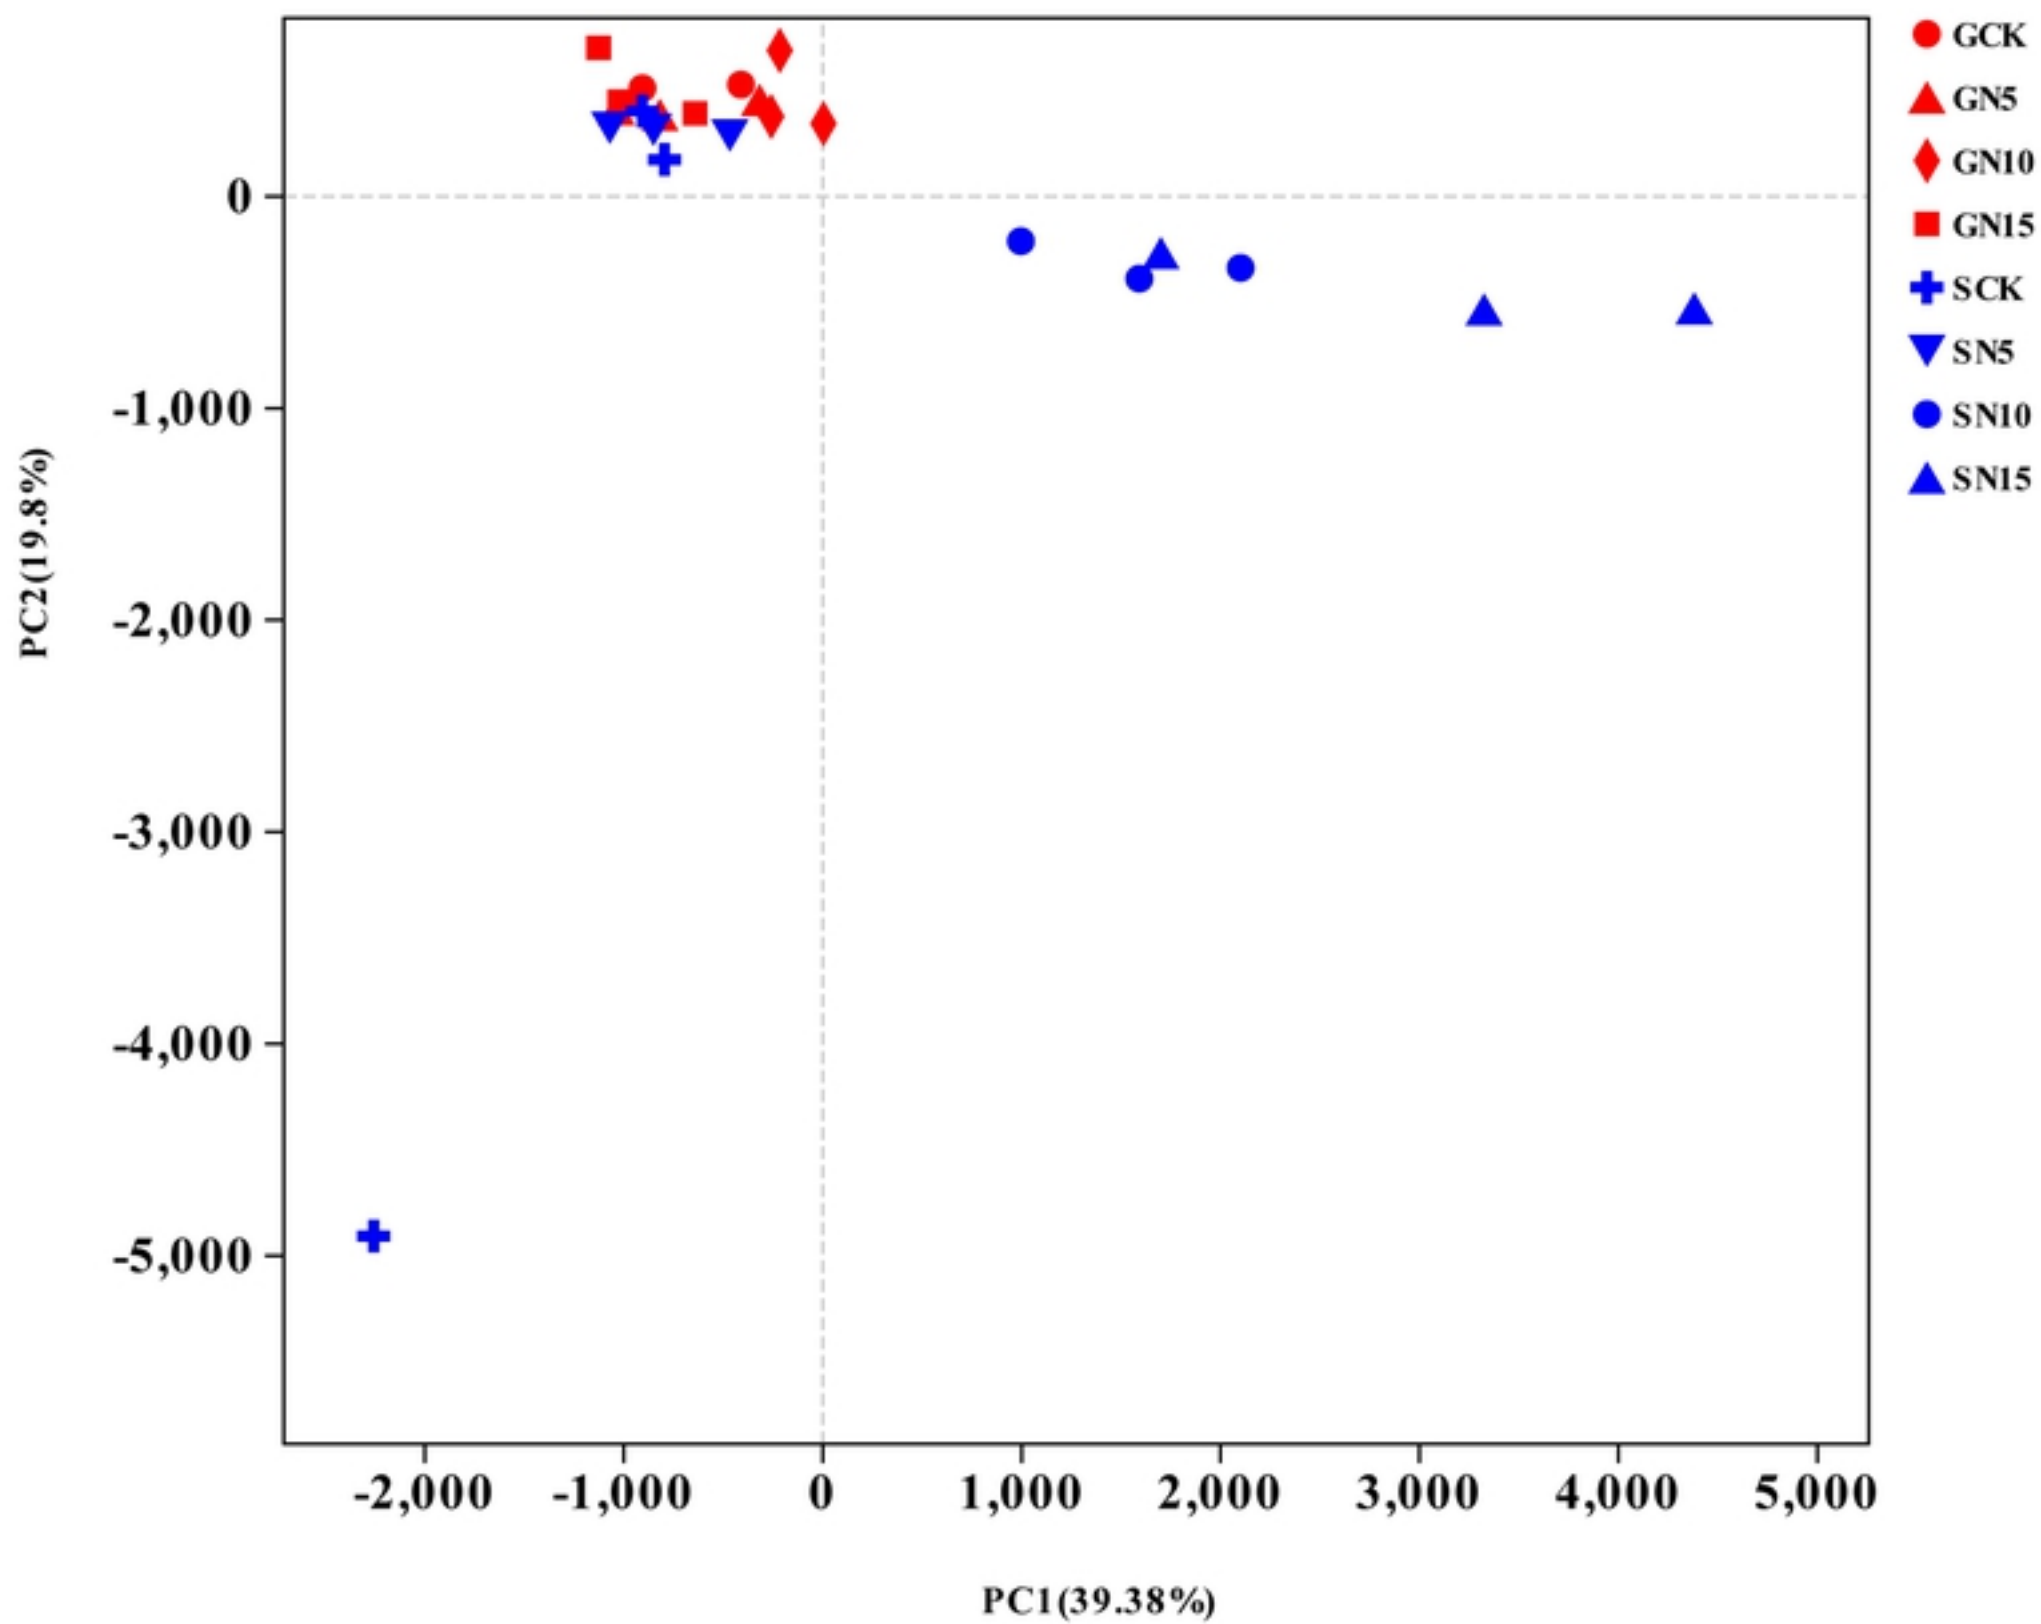

**B**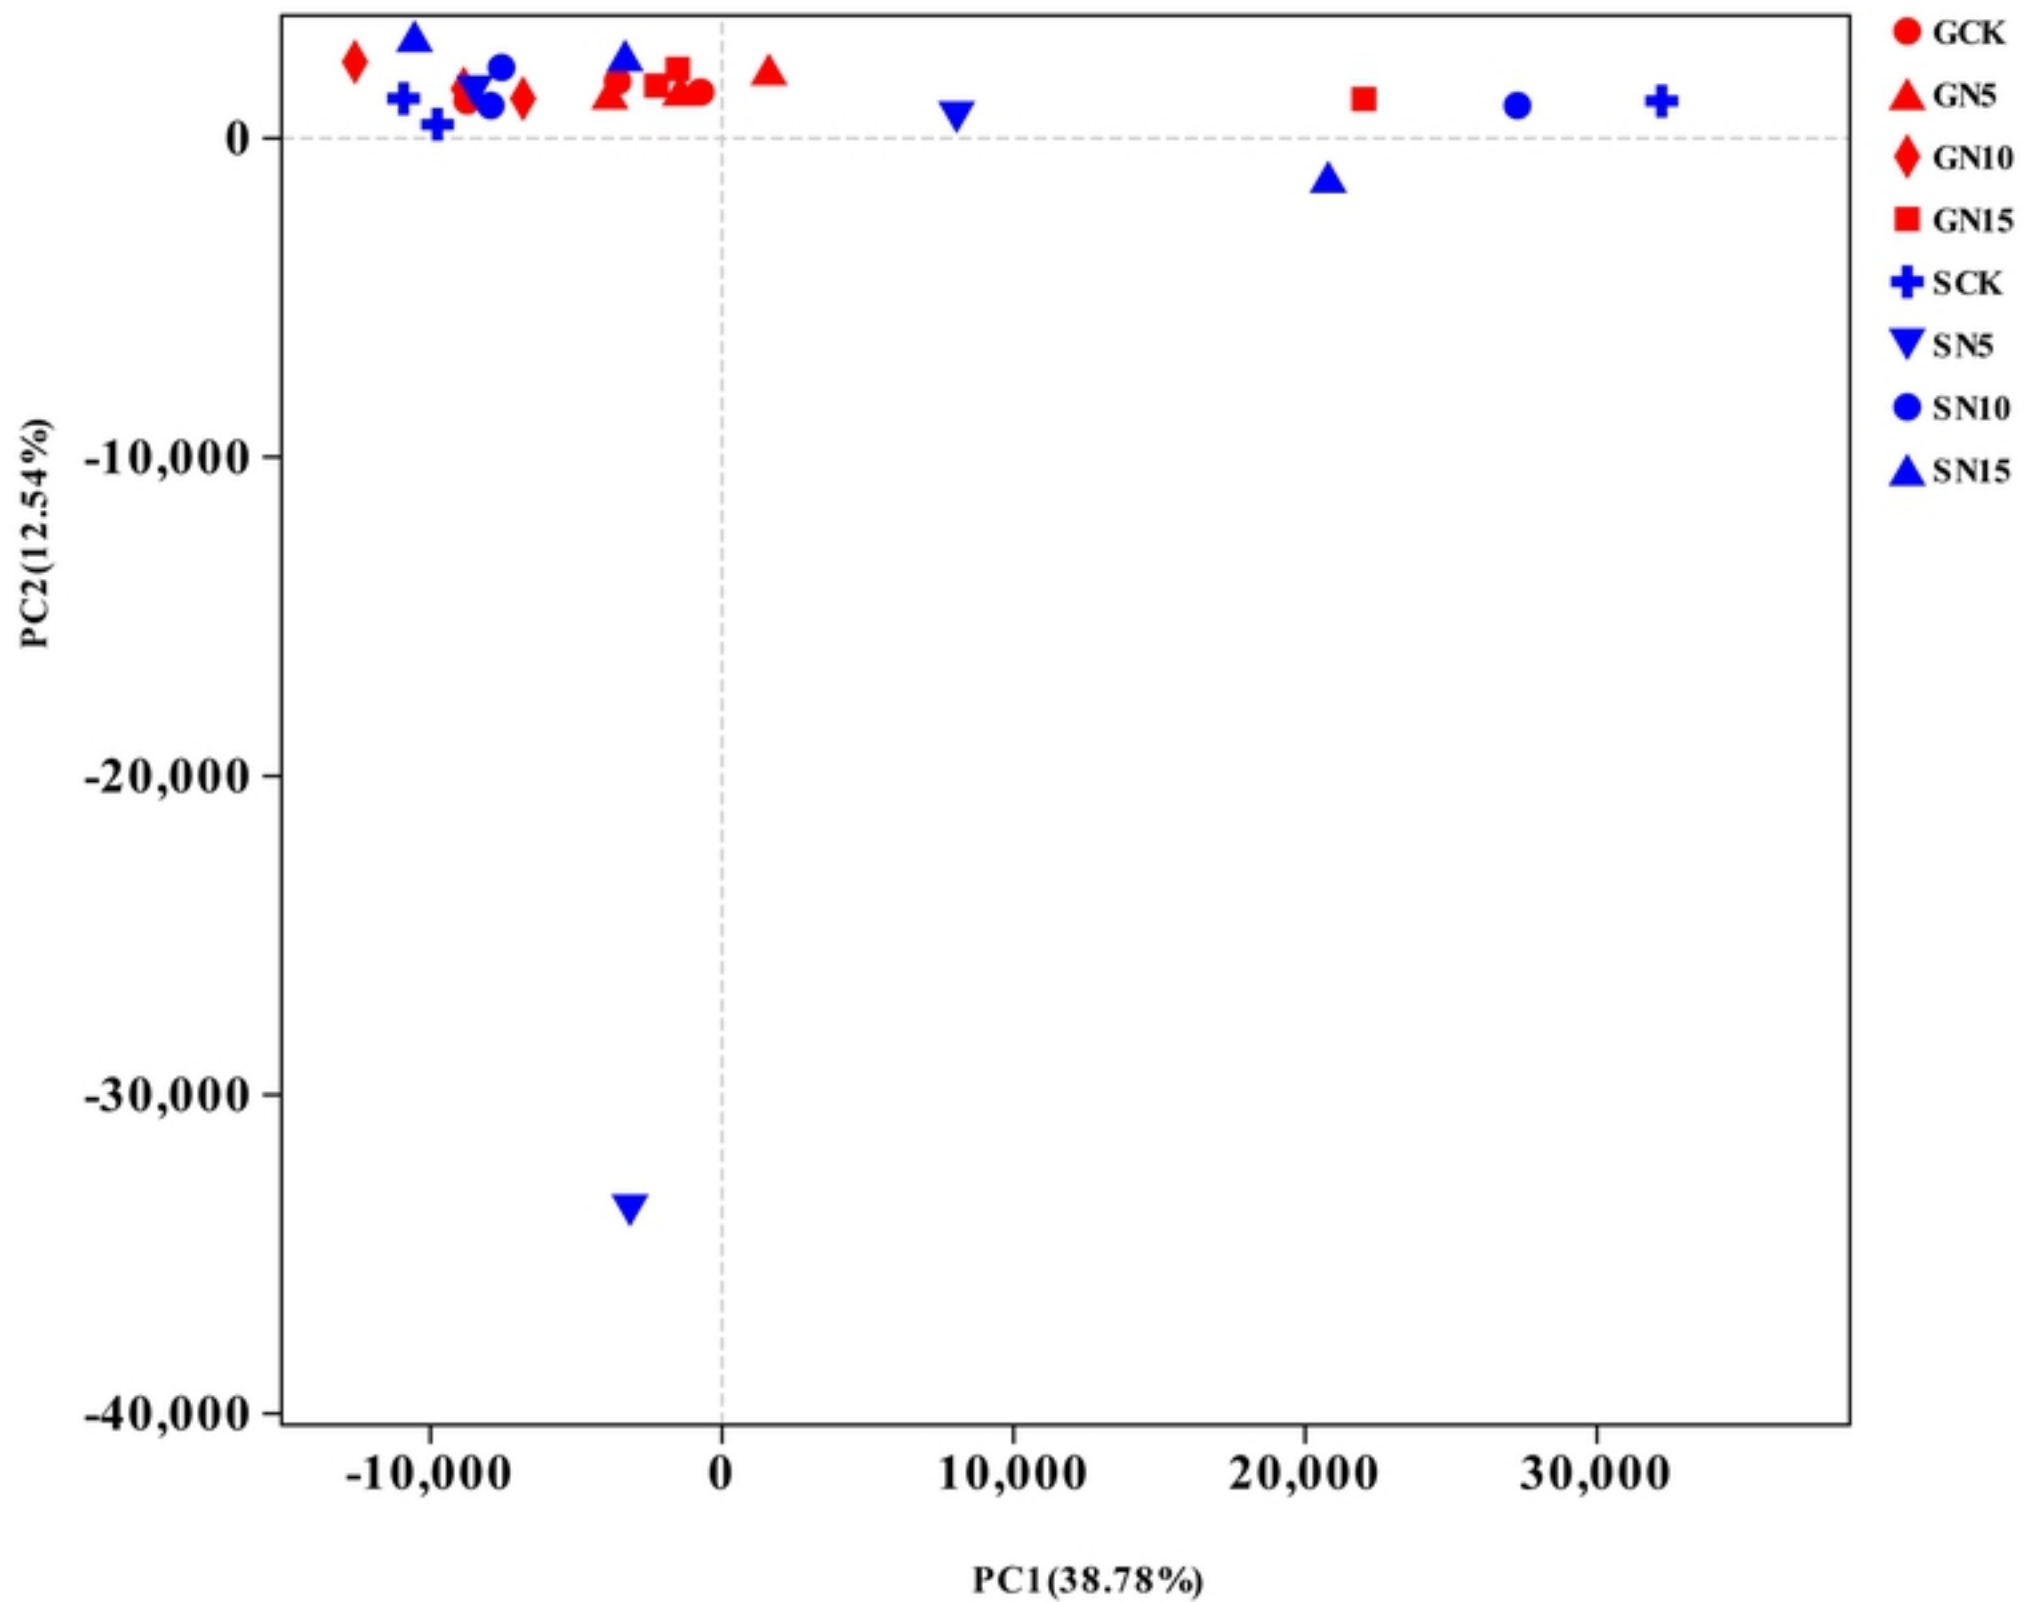

**A**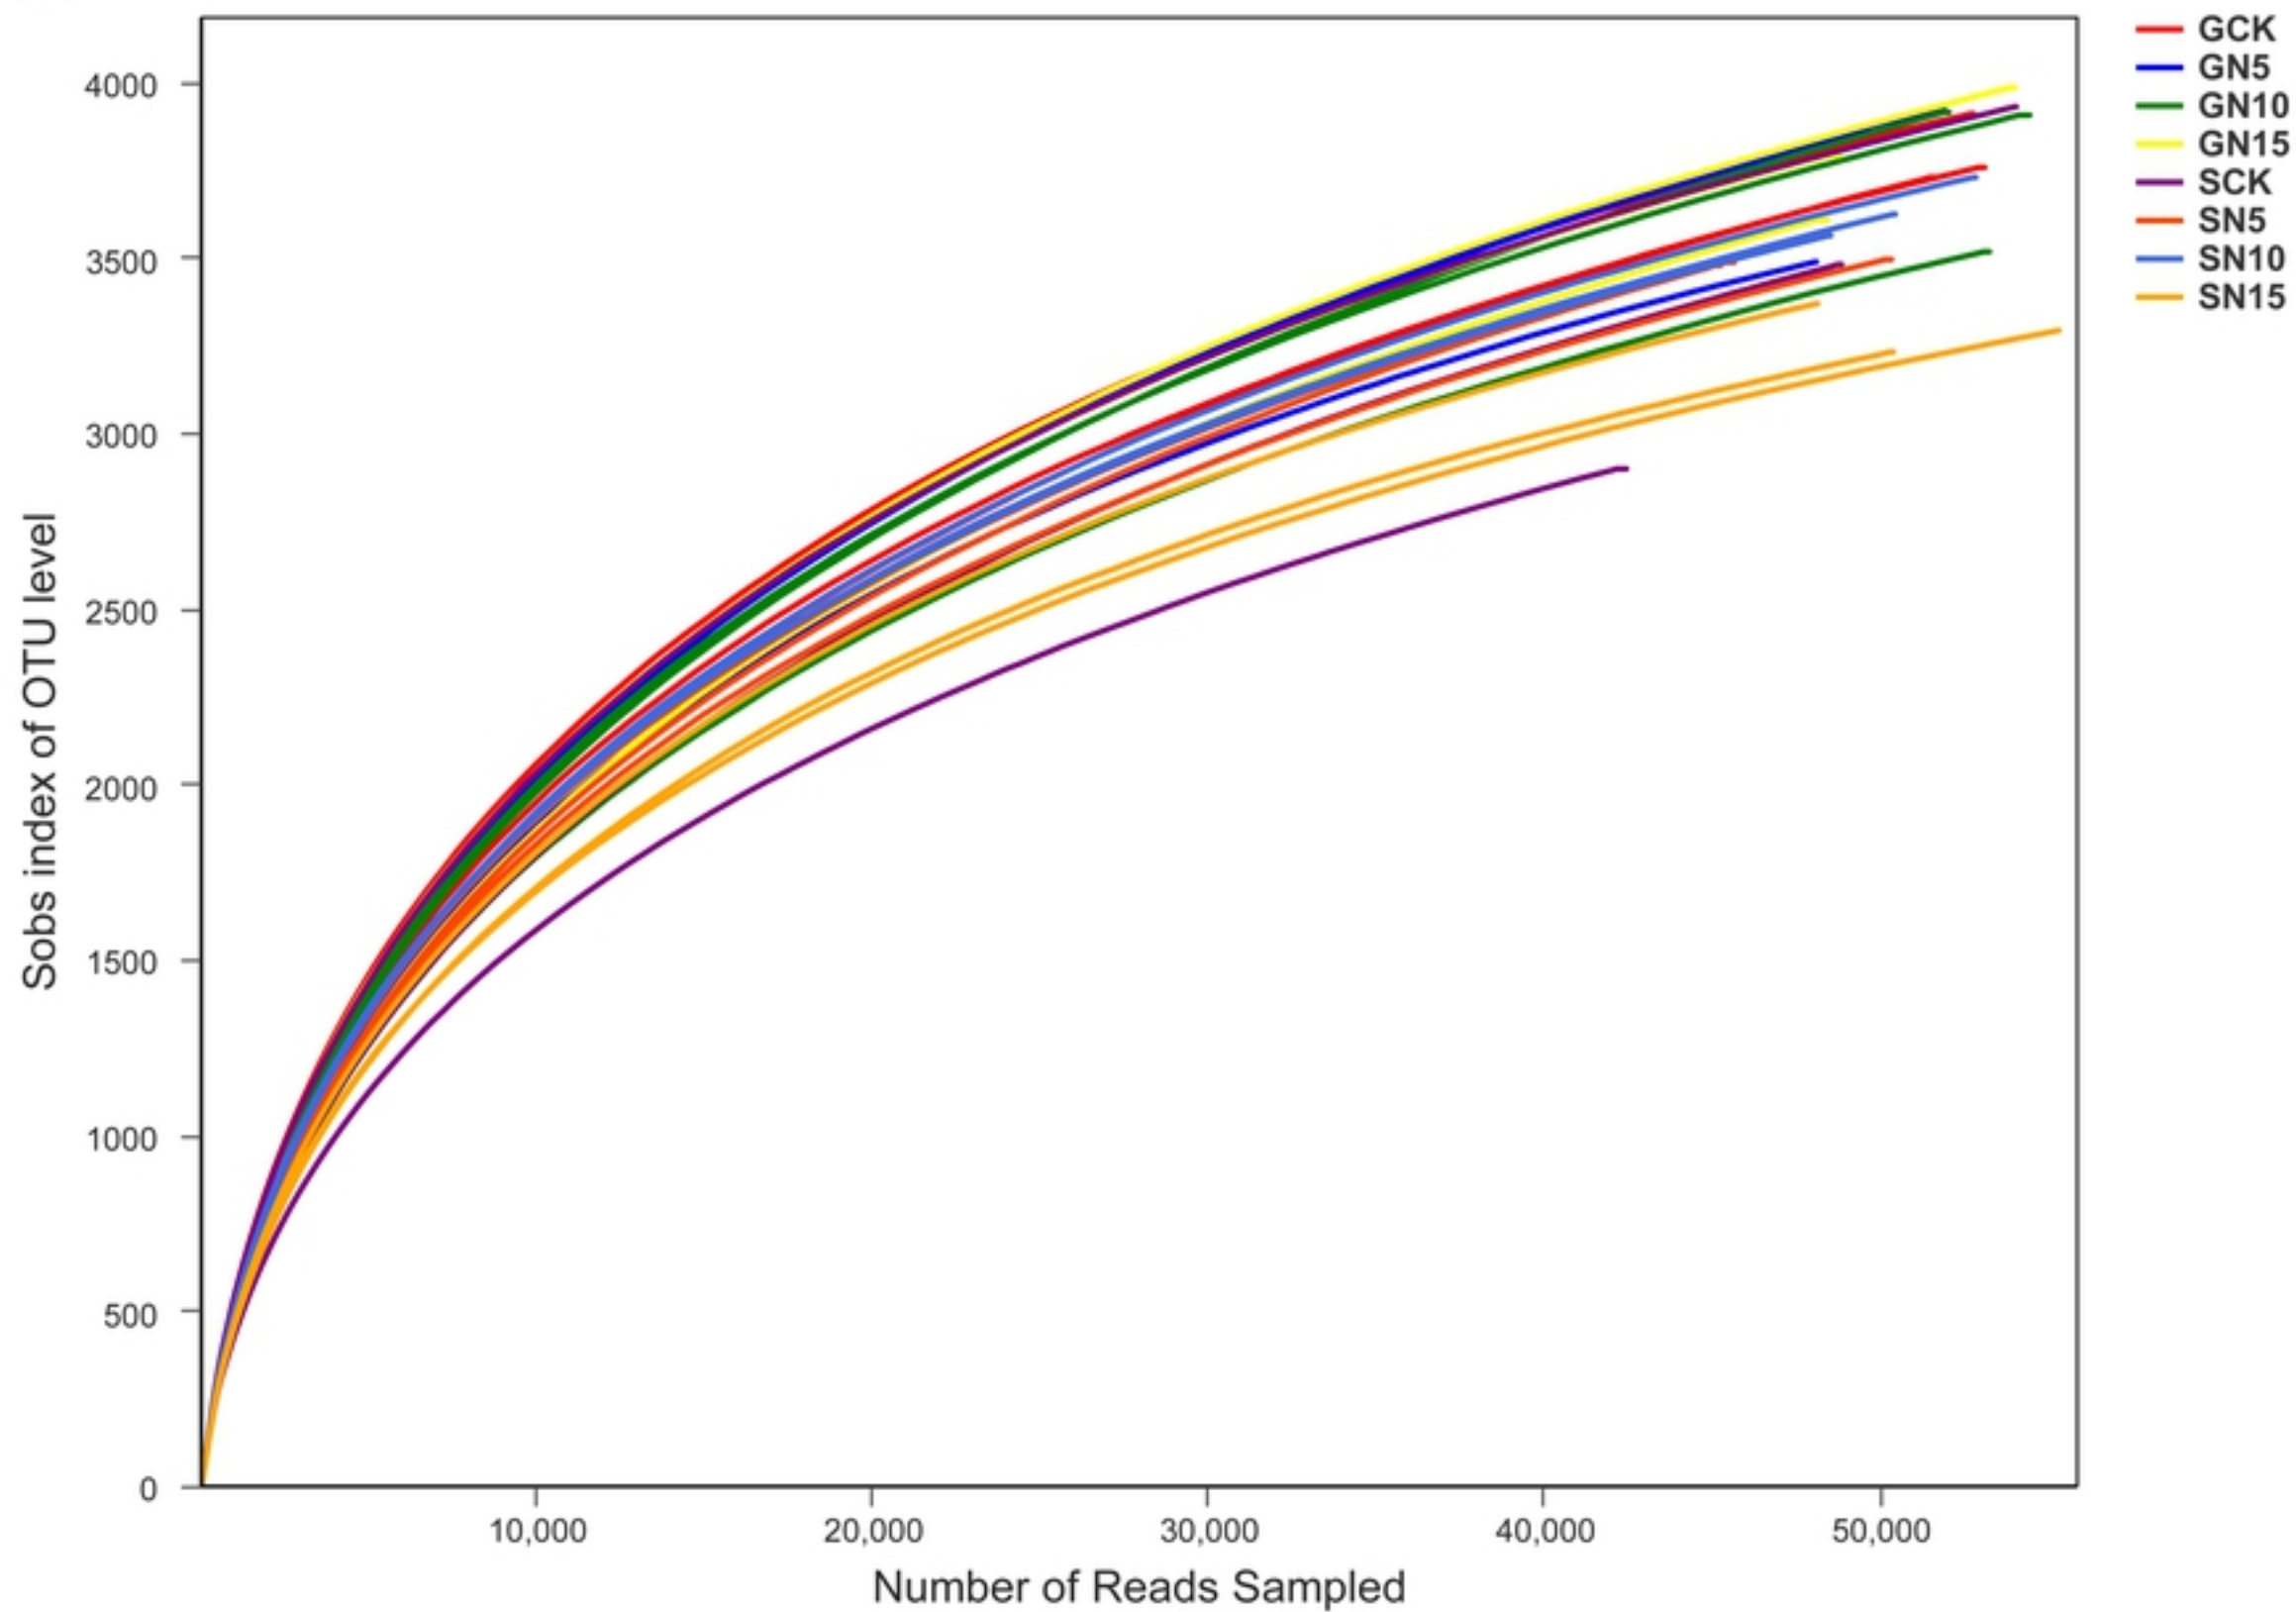

**B**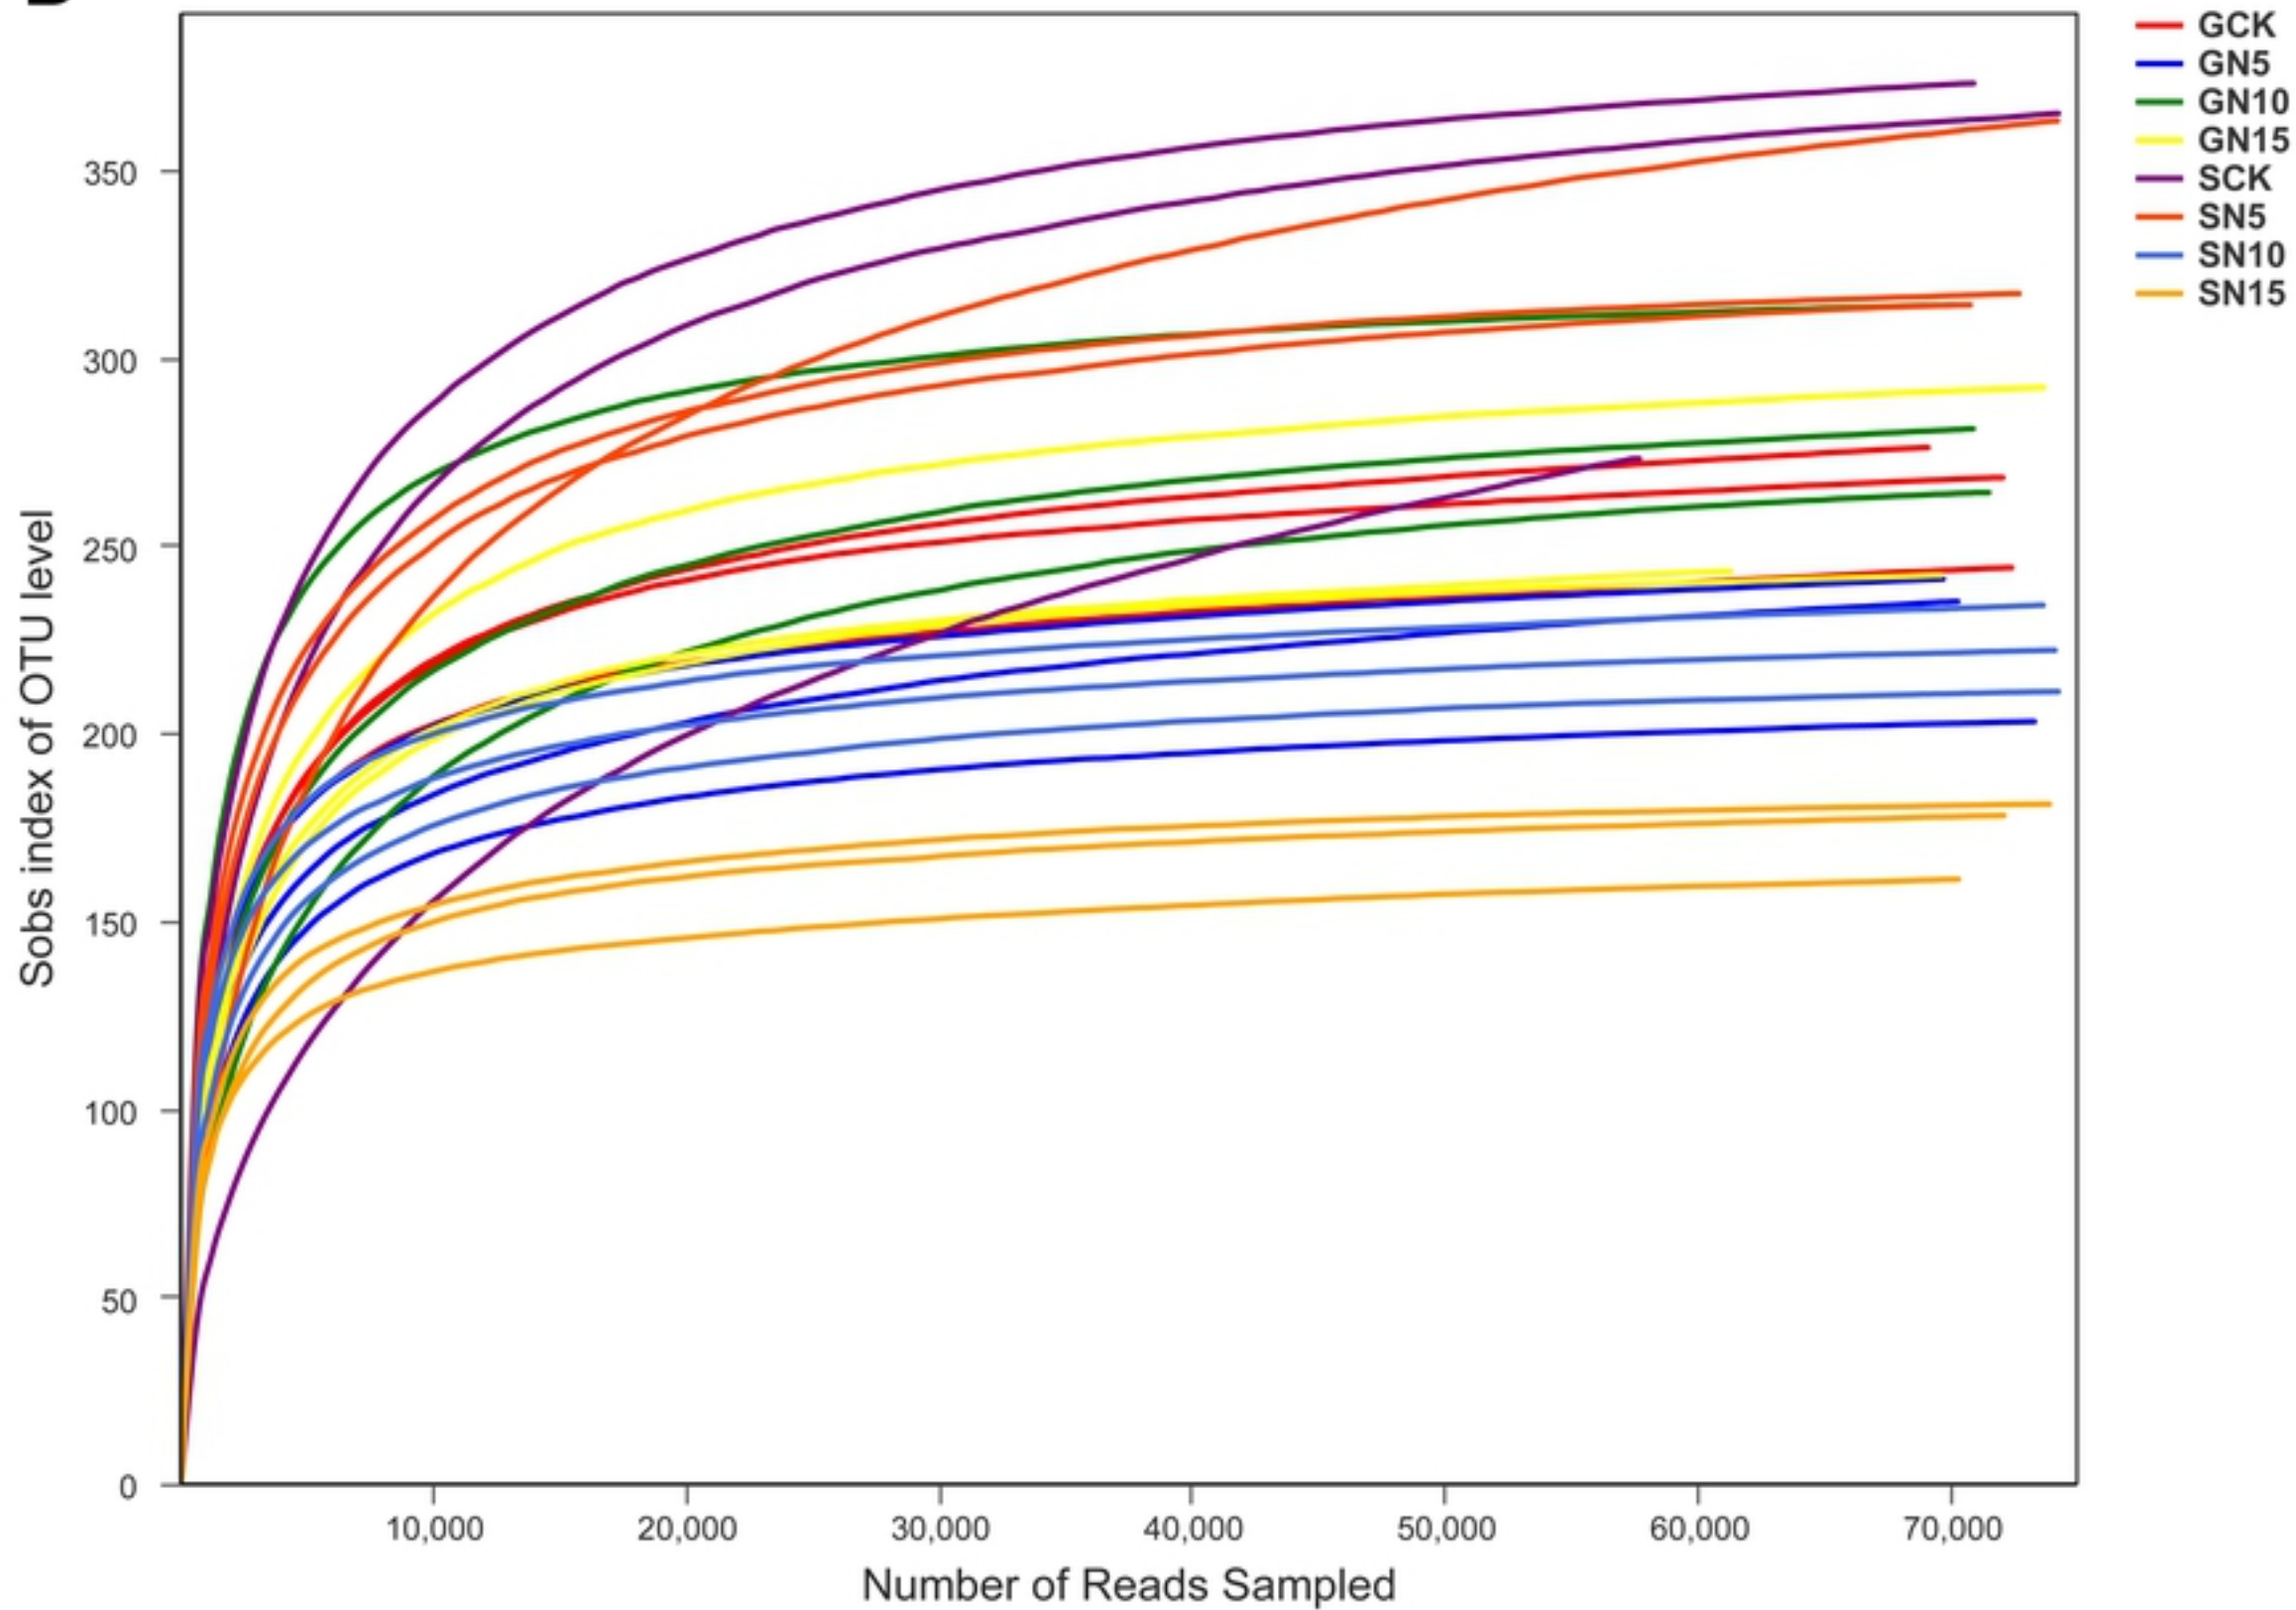

Source: https://www.biorxiv.org/content/10.1101/2020.11.09.374033v1.full.pdf
